2 A stress recovery signaling network for enhanced flooding tolerance in *Arabidopsis thaliana*

3  
4 Elaine Yeung<sup>1</sup>, Hans van Veen<sup>1</sup>, Divya Vashisht<sup>2</sup>, Ana Luiza Sobral Paiva<sup>3</sup>, Maureen Hummel<sup>4</sup>,  
5 Bianka Steffens<sup>5</sup>, Anja Steffen-Heins<sup>6</sup>, Margret Sauter<sup>7</sup>, Michel de Vries<sup>8</sup>, Robert Schuurink<sup>8</sup>, Jérémie  
6 Bazin<sup>9</sup>, Julia Bailey-Serres<sup>1,4</sup>, Laurentius A.C.J. Voesenek<sup>1</sup>, and Rashmi Sasidharan<sup>1</sup>

- 7  
8 1) Plant Ecophysiology, Institute of Environmental Biology, Utrecht University, Utrecht, The  
9 Netherlands  
10 2) Gregor Mendel Institute of Molecular Plant Biology, Austrian Academy of Sciences, Vienna,  
11 Austria  
12 3) Programa de Pós-Graduação em Genética e Biologia Molecular, Departamento de Genética,  
13 Universidade Federal do Rio Grande do Sul, Porto Alegre, Brazil  
14 4) Department of Botany and Plant Sciences, Center for Plant Cell Biology, University of  
15 California, Riverside, California, USA  
16 5) Plant Physiology, Philipps University, Marburg, Germany  
17 6) Institute of Human Nutrition and Food Science, Christian-Albrechts-Universität zu Kiel, Kiel,  
18 Germany  
19 7) Plant Developmental Biology and Plant Physiology, Christian-Albrechts-Universität zu Kiel,  
20 Kiel, Germany  
21 8) Plant Physiology, Swammerdam Institute for Life Sciences, University of Amsterdam,  
22 Amsterdam, The Netherlands  
23 9) IPS2, Institute of Plant Science-Paris Saclay (CNRS-INRA), University of Paris-Saclay, Orsay,  
24 France

25  
26 **Keywords:** flooding, ribosome-sequencing, reactive oxygen species, dehydration, recovery

27  
28 **Author contributions**

29 designed research: E.Y., B.S., M.S., J.B.-S., L.A.C.J.V., R.S.

30 performed research: E.Y., D.V., A.L.S.P., M.H., A.S.-H., M.d.V., J.B.

31 analyzed data: E.Y., H.v.V., D.V., A.L.S.P., M.H., A.S.-H., M.d.V., J.B., J.B.-S., R.S.

32 wrote the paper: E.Y., H.v.V., J.B.-S., L.A.C.J.V., R.S.

33  
34 **Abstract**

35 Abiotic stresses in plants are often transient and the recovery phase following stress removal is critical.  
36 Flooding, a major abiotic stress that negatively impacts plant biodiversity and agriculture, is a  
37 sequential stress where tolerance is strongly dependent on viability underwater and during the post-  
38 flooding period. Here we show that in *Arabidopsis thaliana* accessions (Bay-0 and Lp2-6), different  
39 rates of submergence recovery correlate with submergence tolerance and fecundity. A genome-wide  
40 assessment of ribosome-associated transcripts in Bay-0 and Lp2-6 revealed a signaling network  
41 regulating recovery processes. Differential recovery between the accessions was related to the activity  
42 of three genes: *RESPIRATORY BURST OXIDASE HOMOLOG (RBOHD)*, *SENESCENCE-*  
43 *ASSOCIATED GENE113 (SAG113)* and *ORESARA1 (ORE1/NAC6)* which function in a regulatory  
44 network involving a reactive oxygen species (ROS) burst upon de-submergence and the hormones  
45 abscisic acid and ethylene. This regulatory module controls ROS homeostasis, stomatal aperture and  
46 chlorophyll degradation during submergence recovery. This work uncovers a signaling network that  
47 regulates recovery processes following flooding to hasten the return to pre-stress homeostasis.

48  
49 **Significance statement**

50 Flooding due to extreme weather events can be highly detrimental to plant development and yield.  
51 Speedy recovery following stress removal is an important determinant of tolerance, yet mechanisms  
52 regulating this remain largely uncharacterized. We identified a regulatory network in *Arabidopsis*  
53 *thaliana* that controls water loss and senescence to influence recovery from prolonged submergence.

54 Targeted control of the molecular mechanisms facilitating stress recovery identified here can  
55 potentially improve performance of crops in flood-prone areas.

56

57 \body

## 58 **Introduction**

59 Plants continuously adjust their metabolism to modulate growth and development within a highly  
60 dynamic and often inhospitable environment. Climate change has exacerbated the severity and  
61 unpredictability of environmental conditions that are suboptimal for plant growth and survival, including  
62 extremes in the availability of water and temperature. Under these conditions, plant resilience to  
63 environmental extremes is determined by acclimation not only to the stress itself, but also to recovery  
64 following stress removal. This is especially apparent in plants recovering from flooding. Flooding is an  
65 abiotic stress that has seen a recent global surge with dramatic consequences for crop yields and  
66 plant biodiversity (1–3). Most terrestrial plants, including nearly all major crops, are sensitive to partial  
67 to complete submergence of the above ground organs. Inundations that include aerial organs severely  
68 reduces gas diffusion rates, and the ensuing impedance to gas exchange compromises both  
69 photosynthesis and respiration. Additionally, muddy floodwaters can almost completely block light  
70 access thus further hindering photosynthesis. Ultimately, plants suffer from a carbon and energy crisis  
71 and are severely developmentally delayed (4, 5). As floodwaters recede, plant tissues adjusted to the  
72 reduced light and oxygen in murky waters are suddenly re-exposed to aerial conditions. The shift to an  
73 intensely illuminated and re-oxygenated environment poses additional stresses for the plant, namely  
74 oxidative stress and paradoxically, dehydration due to malfunctioning roots, frequently resulting in  
75 desiccation of the plant (6). Flooding can thus be viewed as a sequential stress where both the  
76 flooding and post-flooding periods pose distinct stressors, and tolerance is determined by the ability to  
77 acclimate to both phases.

78 While plant flooding responses have been extensively studied, less is known about the  
79 processes governing the rate of recovery, particularly the stressors, signals, and downstream  
80 reactions generated during the post-flood period. When water levels recede, it has been hypothesized  
81 that the combination of re-illumination and re-oxygenation triggers a burst of reactive oxygen species  
82 (ROS) production. Re-oxygenation has been shown to induce oxidative stress in numerous monocot  
83 and dicot species (7–11) and related ROS production dependent on the abundance of ROS  
84 scavenging enzymes and antioxidant capacity of tissues (12–16). However, in the link between ROS  
85 and survival during recovery, several aspects remain vague, including the source of the ROS and  
86 whether it also has a signaling role. Mechanisms regulating shoot dehydration upon recovery also  
87 remain to be elucidated. In rice (*Oryza sativa*), the flooding tolerance-associated *SUB1A* gene also  
88 confers drought and oxidative stress tolerance during re-oxygenation through increased ROS  
89 scavenging and enhanced abscisic acid (ABA) responsiveness (9). In *Arabidopsis*, ABA, ethylene, and  
90 jasmonic acid have been implicated in various aspects of post-anoxic recovery (8, 9, 16, 17). While  
91 these studies have furthered understanding of flooding recovery, the key recovery signals, the  
92 hierarchical relationships between them, and the molecular processes regulating variation and  
93 success of recovery remain unclear.

94 To identify causal mechanisms of the variation in recovery tolerance and unravel the  
95 underlying signaling network, we used two *Arabidopsis* accessions Bay-0 and Lp2-6 differing in post-  
96 submergence tolerance. The accessions' sensitivity to complete submergence was primarily due to  
97 differences in the shoot tissue during recovery. Through genome-scale sequencing of ribosome-  
98 associated transcripts during prolonged submergence and subsequent recovery, we identified three  
99 key genes that could explain the superior recovery capacity in Lp2-6: *SENESCENCE-ASSOCIATED*  
100 *GENE113* (*SAG113*), *ORESARA1* (*ORE1/NAC6*), and *RESPIRATORY BURST OXIDASE HOMOLOG*  
101 (*RBOHD*). In a network involving a ROS burst, ethylene and ABA, these players regulate ROS  
102 homeostasis, stomatal aperture, and senescence to ultimately influence recovery.

103

104

105

## 106 **Results**

### 107 **Submergence Recovery in Two *Arabidopsis* Accessions**

108 *Arabidopsis* accessions Bay-0 and Lp2-6 were previously identified as sensitive and tolerant to  
109 complete submergence based on assessment of survival at the end of a recovery period following de-  
110 submergence (18). However, further evaluation indicated that this difference in tolerance was mainly  
111 due to differences in the recovery phase (Fig. 1A and Supplemental Movie). When completely  
112 submerged at the 10-leaf stage for 5 days in the dark, plants of both accessions had similar chlorophyll  
113 content (Fig. 1B) and shoot dry weight (Fig. S1A). Following return to control growth conditions,  
114 however, the tolerant accession Lp2-6 maintained more chlorophyll (Fig. 1B) and increased shoot  
115 biomass (Fig. S1A). Faster development of new leaves in Lp2-6 (Fig. S1B) led to higher fitness based  
116 on a significantly higher seed yield (Fig. 1C). When Bay-0 and Lp2-6 plants were placed in darkness  
117 only, rather than submergence together with darkness, both accessions displayed some leaf  
118 senescence but no clear phenotypic differences (Fig. S1C), indicating that re-aeration determines the  
119 distinction in accession survival.

120 The different recovery survival of the accessions was attributed to the shoot since grafting an  
121 Lp2-6 shoot to a Bay-0 root or a Lp2-6 root did not affect the high tolerance of Lp2-6 shoots. Similarly,  
122 Bay-0 shoots grafted to either Lp2-6 or Bay-0 roots had low tolerance (Fig. 1D and Fig. S1D). Thus,  
123 only shoot traits were further investigated. In both accessions, older leaves showed the most severe  
124 submergence damage, with visible dehydration during recovery. Young leaves and the shoot meristem  
125 survived in both accessions, but intermediate leaves showed the strongest visible differences between  
126 accessions. This correlated with higher chlorophyll content in Lp2-6 intermediate leaves following de-  
127 submergence (Fig. 1E). Interestingly, photosynthetic capacity after de-submergence, as reflected in  
128 Fv/Fm (variable fluorescence/maximal fluorescence), was higher in Bay-0 leaves compared to Lp2-6  
129 leaves (Fig. 1F). In subsequent recovery time points, however, Bay-0 intermediate leaves failed to  
130 recover towards control Fv/Fm values, whereas Lp2-6 leaves showed full recovery by 3 days following  
131 de-submergence. Lower Fv/Fm values in Bay-0 during recovery indicated more photosystem II  
132 damage, which may have prevented replenishment of starch reserves (Fig. 1G). Based on this  
133 characterization of Bay-0 and Lp2-6, further analyses were restricted to the intermediate leaves  
134 showing the clearest variable effects of de-submergence stress between both accessions.

### 135 136 **Ribo-seq Reveals Conserved and Accession-Specific Changes in Ribosome-Associated** 137 **Transcripts During Submergence and Recovery**

138 To identify molecular processes contributing to observed differences in Bay-0 and Lp2-6 during  
139 submergence and recovery, the intermediate leaves showing a strong physiological response to de-  
140 submergence were subjected to an unbiased ribosome-sequencing (Ribo-seq) approach (18, 19) (Fig.  
141 2 and Fig. S2A). Translatome analysis by ribosome footprint sequencing (Ribo-seq) was selected over  
142 transcriptome analysis by RNA-seq to increase the likelihood of identifying differentially regulated  
143 transcripts that were actively translated, as selective mRNA translation contributes to gene regulation  
144 in response to dynamics in oxygen, light, ROS and ethylene (20–24). Intermediary leaves were  
145 harvested from plants at the start of the treatment (0h control); submerged in the dark for 5 days (sub)  
146 and recovered for 3 hours after de-submergence (rec) (Fig. 2A). Each translatome library consisted of  
147 at least 38 million reads mapped to the Col-0 genome (Fig. S2B). Multidimensional scaling (MDS)  
148 showed that biological replicates clustered together (Fig. S2C). Furthermore, treatments and  
149 accessions clearly clustered separately. Under control conditions the Bay-0 and Lp2-6 translatomes  
150 grouped together. As expected, the reads mapped primarily to protein coding regions (Fig. S2D).

151 A large number of genes responded significantly to the treatments and their responses were  
152 statistically indistinguishable between the accessions (Fig. 2B). These similarly behaving genes were  
153 resolved into five clusters using fuzzy K-means clustering (Fig. S3) and enriched gene ontology (GO)  
154 categories for these clusters were identified. In both accessions, the common response genes  
155 involved in light perception and photosynthesis were downregulated by submergence in darkness but  
156 were not re-activated upon recovery (K1). Genes associated with the cytoplasmic translational process  
157 were also downregulated (K2), but were upregulated upon recovery. In contrast, responses involved in  
158 carbon limitation were strongly induced by submergence and downregulated during recovery (K4).

159 Stress-related GO categories involved in water deprivation and ROS increased upon submergence  
160 and rose further during recovery (K5).

161 To obtain an understanding of processes important for strong performance during recovery,  
162 we identified genes at each harvest time-point differing in mRNA abundance between the two  
163 accessions (Fig. S2E), and genes that responded to the treatments differently (Fig. S2E and F).  
164 Treatment-independent differences increased after submergence and increased even further after the  
165 brief recovery period. This was reflected in the number of differentially expressed genes (DEGs) in the  
166 accession-specific treatment responses, which was largest when considering the combination of  
167 submergence and recovery (Fig. 2B and Fig. S2F).

168 Genes with accession-specific regulation were sorted into seven clusters of similarly regulated  
169 genes by fuzzy K-means clustering, in which enriched GO categories were identified (Fig. 2C). The  
170 five largest clusters (K1-K5) of contrasting response genes were characterized by stronger regulation  
171 in Bay-0 compared to Lp2-6. During submergence in Bay-0, the GO terms rRNA processing and  
172 ribosome biogenesis were strongly downregulated and only marginally recovered upon de-  
173 submergence. In Lp2-6, these genes hardly responded to submergence and returned to their original  
174 values upon recovery. The same behavior was found in cluster 2 (K2), however, with no recovery in  
175 Bay-0 but with a clear recovery response in Lp2-6. GO categories enriched in K2 were related to  
176 photosynthesis, light stimuli, and pigment biosynthesis. Cluster 4 (K4), the largest group, was  
177 characterized by strong upregulation during submergence and little recovery response in Bay-0. Yet, in  
178 Lp2-6, gene induction during submergence was smaller and expression values approached their  
179 original control levels during recovery. Corresponding GO categories were related to ethylene and  
180 abscisic acid (ABA) signaling, senescence, autophagy, biotic defense, and oxidative stress.

181

### 182 **Inability to Maintain ROS Homeostasis Hinders Recovery**

183 Ribo-seq analyses strongly pointed towards oxidative stress and ROS metabolism as important  
184 recovery components. As fuzzy K-means plots revealed, both similarly- and contrastingly-responding  
185 genes are overrepresented in GO categories related to oxidative stress (Fig. 2C and Fig. S3). During  
186 submergence, more of these transcripts were associated with ribosomes, with a further increase after  
187 3 hours of recovery. Since this trend was stronger in Bay-0, we investigated the hypothesis that Bay-0  
188 experienced greater oxidative stress thus hindering recovery.

189 ROS production was measured by assessing levels of the lipid peroxidation product  
190 malondialdehyde (MDA). After 5 days of submergence (0 hour after de-submergence), shoot MDA  
191 levels were similar to levels in shoots from control non-submerged plants and not different between the  
192 accessions (Fig. 3A). During subsequent recovery, MDA levels sharply increased in sensitive Bay-0  
193 within 3 hours, and continued to increase over the 3 days of recovery monitored. By contrast, MDA  
194 levels in Lp2-6 shoots remained much lower at all recovery time points. ROS production in  
195 intermediate leaves was directly quantified using electron paramagnetic resonance (EPR)  
196 spectroscopy, which facilitates radical species detection by combination with a spin trapping technique  
197 to prolong radical half-life. EPR revealed that ROS content in intermediate leaves under control  
198 conditions was close to the detection limit (Fig. 3B). Whereas ROS levels were comparable between  
199 the accessions at the end of 5 days of submergence, levels began to increase 1 hour after de-  
200 submergence in both accessions. This indicated that ROS production is most pronounced following  
201 de-submergence. In Bay-0, ROS accumulation peaked at 3 hours of recovery. Afterwards, ROS levels  
202 dropped but remained relatively high until the last measurement time point of 24 hours after de-  
203 submergence. ROS levels surged in Lp2-6 1 hour after de-submergence, corresponding with  
204 concurrent slightly higher MDA production, but subsequently dropped and remained at significantly  
205 lower levels than Bay-0 at all subsequent time points. ROS were also measured on intermediate  
206 leaves from plants placed in darkness for 5 days followed by recovery in control light conditions (Fig.  
207 S4A). In both accessions, despite higher ROS levels than control leaves after 5 days of darkness,  
208 there was no increase in the recovery period and ROS decreased to the same levels as control plants  
209 at 7 and 24 hours of re-illumination. Thus, the ROS burst and ROS content differences during recovery  
210 between the two accessions following de-submergence are linked to re-oxygenation rather than re-  
211 illumination.

212 The direct ROS measurements confirmed that recovery triggered greater ROS accumulation  
213 and associated damage in Bay-0. We therefore hypothesized that improved recovery in Lp2-6 is  
214 associated with higher oxidative stress tolerance. To assess this, non-submerged plants were sprayed  
215 with increasing concentrations of ROS generating methyl viologen (25, 26). For all methyl viologen  
216 concentrations tested, Bay-0 had significantly higher MDA levels than Lp2-6, indicating higher ROS-  
217 mediated damage and sensitivity to oxidative stress (Fig. 3C). To determine whether higher oxidative  
218 stress tolerance of Lp2-6 could be a consequence of better ROS amelioration capacity, the  
219 antioxidants glutathione and ascorbate were quantified in intermediate leaves. After 5 days of  
220 submergence, ascorbate content was significantly higher in Lp2-6, but glutathione levels were similar  
221 to that of non-stressed plants in both accessions (Fig. 3D and E). Starting from 1 hour of recovery,  
222 both glutathione and ascorbate increased significantly in Lp2-6, and continued to increase compared  
223 to controls (pre-sub) up to 3 to 5 hours after de-submergence. Although ascorbate levels increased in  
224 Bay-0, it was delayed compared to Lp2-6 (from 1 day of recovery onwards).

225 Additionally, we looked for candidate accession-specific genes in the Ribo-seq dataset that  
226 could explain higher ROS production in Bay-0. We identified the plasma membrane bound NADPH  
227 oxidase *RESPIRATORY BURST OXIDASE HOMOLOGUE* (*RBOHD*; At5g46910) that catalyzes ROS  
228 production. Ribosome-associated transcript abundance of *RBOHD* increased during submergence in  
229 Bay-0, and recovery conditions further elevated *RBOHD* transcript abundance compared to a  
230 moderate induction in Lp2-6 (Fig. S2D). This was further confirmed at the level of total transcript  
231 abundance by qRT-PCR in an independent experiment (Fig. S4B).

232 To assess the physiological role of *RBOHD* and an associated ROS burst during recovery, the  
233 well characterized *rbohD-3* loss-of-function mutant (27, 28) was investigated in comparison to its wild-  
234 type background Col-0, which is of intermediate submergence tolerance (29, 30). The *rbohD-3* mutant  
235 effectively limited ROS production during recovery as discerned by extremely low MDA content in  
236 contrast to wild-type Col-0 plants (Fig. 4A and Fig. S4A). However, despite the high MDA content (Fig.  
237 4A), wild-type plants recovered from submergence better than *rbohD-3* as reflected in higher  
238 chlorophyll content (Fig. 4B) and faster new leaf formation (Fig. 4C; Fig. S4C).

239 The necessity of a transient ROS burst involving *RBOHD* upon de-submergence to initiate  
240 signaling might explain slower recovery of *rbohD-3* mutants. However, based on higher *RBOHD*  
241 transcript accumulation in Bay-0, we hypothesized that excessive and prolonged ROS production  
242 hinders recovery. To test this, the transient ROS burst observed upon de-submergence (3 hours and 1  
243 hour after de-submergence in Bay-0 and Lp2-6 respectively), was manipulated by chemical inhibition  
244 of *RBOH* activity. Rosettes were sprayed with the NADPH oxidase inhibitor diphenyleneiodonium  
245 (DPI) during the first hour after de-submergence. In Bay-0, DPI application significantly reduced MDA  
246 content during recovery (Fig. 4D). Furthermore, DPI boosted Bay-0 recovery compared to mock-  
247 sprayed plants (Fig. S4D), as reflected in significantly higher chlorophyll content within 1 day of  
248 recovery (Fig. 4E) and faster new leaf development (Fig. 4F). For Lp2-6, which accumulated less ROS  
249 upon recovery, DPI application further reduced ROS production as indicated by MDA content (Fig.  
250 4G). MDA content in DPI-sprayed plants was low at all recovery time points, although slightly higher  
251 than levels in *rbohD-3*, whereas mock-sprayed plants had strong MDA accumulation up to 3 days of  
252 de-submergence. Even though the dampening of recovery by DPI on Lp2-6 was not as severe as in  
253 the *rbohD-3* (Fig. S4E), recovery was hindered in DPI-sprayed Lp2-6 plants as indicated by lower  
254 chlorophyll content (Fig. 4H) and delayed production of new leaves (Fig. 4I).

255 These data demonstrate that excessive ROS accumulation limits recovery, whereas limited  
256 and controlled ROS production soon after de-submergence is beneficial for recovery. In Bay-0, DPI  
257 application likely dampened the otherwise excessive ROS formed upon de-submergence, thus  
258 improving recovery. However, Lp2-6 recovery was hampered when ROS levels were significantly  
259 reduced over the recovery time course. We conclude that a fine-tuned balance between production  
260 and scavenging of ROS generated by *RBOHD* and possibly other NADPH oxidases is critical for  
261 recovery of leaf formation and ultimately fecundity following de-submergence.

262

263 **Dehydration Stress Upon De-Submergence Hampers Recovery**

264 Accession-specific DEGs were also enriched for GO categories associated with dehydration: ABA  
265 response and senescence (Fig. 2C). Dehydration and senescence were clearly visible during recovery  
266 and these symptoms were more severe in Bay-0 (Fig. 1A). To assess leaf water management during  
267 recovery, relative water content (RWC) was measured in intermediate leaves following de-  
268 submergence (Fig. 5A). RWC dropped significantly in both accessions 3 hours after de-submergence,  
269 although Lp2-6 retained higher water status. RWC values above 70% were maintained at subsequent  
270 time points by Lp2-6, while values dropped below 65% by 3 hours and did not recover in Bay-0. A  
271 similar trend was observed in water loss assays in detached de-submerged shoots over a 6-hour  
272 period. In both accessions, in the first hour after separation from the root, a steep increase in water  
273 loss was observed in detached shoots (Fig. 5B). Yet, water loss at all subsequent time points was  
274 significantly lower in Lp2-6.

275 As rate of water loss is closely linked to stomatal conductance, we investigated whether the  
276 differences in dehydration response between the accessions was related to stomatal traits. Stomatal  
277 size and density were not significantly different between the two accessions (Fig. S1E and Fig. S1F).  
278 However, stomatal aperture following de-submergence differed between Bay-0 and Lp2-6. While most  
279 stomata were partially open in both accessions an hour after de-submergence (Fig. 5C), stomatal  
280 aperture values further decreased in Lp2-6 and remained low up to 6 hours after de-submergence,  
281 indicating stomatal closure. By contrast, Bay-0 stomata reopened by 3 hours and remained open at 6  
282 hours after de-submergence, as indicated by higher stomatal aperture values.

283 Stomatal aperture regulation in response to drought signals is primarily controlled by ABA,  
284 supported by appearance of the “response to ABA” GO category (Fig. 2C and Fig. S3). To examine  
285 stomatal responsiveness to exogenous ABA in the two accessions, abaxial epidermal peels from non-  
286 stressed plants were incubated in varying ABA concentrations (Fig. 5D). Lp2-6 was more sensitive to  
287 ABA, with significantly smaller stomatal apertures under 50 and 100  $\mu$ M ABA compared to Bay-0. To  
288 determine if differences in ABA content contributed to the contrasting stomatal aperture response in  
289 Bay-0 and Lp2-6, ABA levels were measured in intermediate leaves after de-submergence and during  
290 the corresponding circadian light time points (Fig. 5E). Average ABA content in Bay-0 was higher after  
291 5 days of submergence (0 hour of de-submergence) and at all subsequent recovery time points up to 3  
292 days of recovery. Since the ABA measurements did not reconcile with the role of ABA as a positive  
293 regulator of stomatal closure, we explored the data for de-submergence-associated signals that might  
294 antagonize ABA action.

### 295 296 **Ethylene Accelerates Dehydration and Senescence During Recovery in Bay-0 Mediated by** 297 **SAG113 and ORE1**

298 The Ribo-seq data revealed accession-specific genes in the “ethylene-activated signaling pathway”  
299 (Fig. 2C). To further investigate the role of ethylene in the differential submergence recovery  
300 responses of the two accessions, whole plant ethylene emission was measured. Ethylene production  
301 was significantly higher in Bay-0 than in Lp2-6 after 5 days of submergence (0 hours of de-  
302 submergence), and this trend persisted 1 hour and 1 day after de-submergence (Fig. 6A). Ethylene  
303 production in Lp2-6 was almost half that in Bay-0. To investigate whether this ethylene was causal to  
304 the stomatal response and plant performance, as reflected in higher chlorophyll loss in Bay-0 during  
305 recovery, ethylene action was blocked using 1-methylcyclopropene (1-MCP). Treatment of Bay-0  
306 plants with 1-MCP following de-submergence strongly reduced the number of open stomata (Fig. 6B)  
307 and decline in chlorophyll content (Fig. 6C). We next explored the Ribo-seq dataset for genes that  
308 might mediate the ethylene effect on stomatal behavior and chlorophyll loss during recovery. Amongst  
309 the accession-specific genes, we identified two previously confirmed targets of the transcription factor  
310 EIN3, a positive regulator of ethylene signaling (31, 32): *SENESCENCE ASSOCIATED GENE 113*  
311 (*SAG113*; At5g59220) and the transcription factor *NAC DOMAIN CONTAINING PROTEIN*  
312 *6/ORE1/ORESARA 1 (ANAC092/NAC2/NAC6*; At5g39610).

313 Both *SAG113* and *ORE1* were identified as accession-specific genes with increased  
314 ribosome-associated transcript abundance in Bay-0 during submergence and 3 hours of recovery,  
315 whereas Lp2-6 showed low induction of these transcripts. This trend was confirmed using qRT-PCR in  
316 an independent experiment assessing total *SAG113* and *ORE1* transcript abundance (Fig. 7A and B).

317 *SAG113* encodes a protein phosphatase 2C implicated in the inhibition of stomatal closure to  
318 accelerate water loss and senescence in *Arabidopsis* leaves (33, 34). *ORE1* has been previously  
319 characterized as a positive regulator of leaf senescence (35–37). In accordance with their identity as  
320 EIN3 targets, 1-MCP treatment of Bay-0 following de-submergence significantly repressed *ORE1* and  
321 *SAG113* transcript abundance increase during recovery (Fig. 7C and D). Although 1-MCP suppressed  
322 the de-submergence promoted transcript accumulation, both *ORE1* and *SAG113* are also reported to  
323 be ABA inducible (33, 38). However, application of an ABA antagonist (AA1) (39) significantly  
324 suppressed the de-submergence-induced increase in transcript abundance of *SAG113* only (Fig. S5).  
325 Accordingly, AA1-treated plants had a higher percentage of closed stomata corresponding with the  
326 role of *SAG113* in stomatal closure of senescing leaves (Fig. S5E). Effectiveness of the ABA inhibitory  
327 action of AA1 was confirmed with rescuing ABA-induced inhibition of seed germination (Fig. S5F) and  
328 dark-induced senescence as described by (39), and qRT-PCR of the ABA-regulated genes *RD29B*  
329 and *RD22* (Fig. S5C and D).

330 Evaluation of a previously characterized knockout mutant for *SAG113* (33, 34), revealed  
331 significantly fewer closed stomata at 3 and 6 hours after de-submergence compared to the wild-type  
332 Col-0, correlating with significantly reduced water loss (Fig. 7G and H). Loss-of-function *ore1* mutants  
333 (35), had less leaf chlorosis and significantly higher chlorophyll content after 5 days of recovery than in  
334 wild-type Col-0 plants (Fig. 7I). In conclusion, *SAG113*, induced by the higher ethylene production and  
335 ABA levels in Bay-0, contributes to premature stomatal opening and subsequent dehydration.  
336 Simultaneously, higher ethylene production in Bay-0 was responsible for *ORE1* induction leading to  
337 senescence, as reflected in higher chlorophyll breakdown.

338

### 339 Discussion

340 Timely recovery following stress exposure is critical for plant survival. Flooding severely reduces light  
341 intensity and gas exchange and subsequent effects on respiration and photosynthesis cause a severe  
342 energy and carbon imbalances (2). Floodwater retreat poses new stress conditions as low light- and  
343 hypoxia-acclimated plant tissues encounter terrestrial conditions again. Here we exploited two  
344 *Arabidopsis* accessions in which differences in submergence tolerance were primarily due to  
345 distinctions in submergence recovery. This system revealed that superior recovery after de-  
346 submergence is an important aspect of submergence tolerance linked to reproductive output and thus  
347 plant fitness (Fig. 1C). Using these accessions, we sought to identify molecular and physiological  
348 processes and regulatory components influencing recovery.

349 It is generally accepted that the transition back to re-illuminated and re-oxygenated conditions  
350 results in a transient ROS burst in recovering tissues due to reactivation of photosynthetic and  
351 mitochondrial electron transport promoting excessive electron and proton leakage (40–42). Re-  
352 oxygenation led to increased ROS production in both accessions, but sensitive Bay-0 was unable to  
353 control prolonged and excessive ROS production during recovery. This could explain the severe  
354 photoinhibition (Fig. 1F) and hindered starch replenishment in this accession (Fig.1G) during  
355 submergence recovery. ROS production differences between the two accessions corresponded with  
356 higher *RBOHD* transcript abundance during recovery in Bay-0. Counterintuitively, significantly  
357 reducing post-submergence ROS generation through genetic (*rbohD-3*) or pharmacological means  
358 (DPI application in Lp2-6) worsened recovery. Although excessive ROS are damaging, controlled ROS  
359 production via *RBOHD* might be required for stress signaling during submergence recovery.

360 ROS production has been previously implicated in hypoxia signaling (43, 44). *RBOHD* is an  
361 *Arabidopsis* core hypoxia gene (45, 46) and a transient *RBOHD*-mediated ROS burst during hypoxia  
362 was found to be essential for induction of genes required for hypoxia acclimation (anaerobic  
363 metabolism) and seedling survival (44). Pretreatment of *Arabidopsis* seedlings with DPI prior to  
364 hypoxia reduced core response gene upregulation and limited survival (43). *RBOHD* is also a  
365 candidate gene within a quantitative trait locus conferring submergence tolerance in 10-12 leaf stage  
366 *Arabidopsis* (47). Our results demonstrate that *RBOHD* also has an essential role in submergence  
367 recovery. In Lp2-6, higher oxidative stress tolerance was linked to restricted ROS accumulation within  
368 one hour of de-submergence and a significant increase in antioxidant status (Fig. 3D and E). Clearly,  
369 maintenance of a delicate balance of ROS and antioxidants is critical to cellular homeostasis. While

370 controlled ROS production is essential, it needs to be countered by an effective antioxidant defense  
371 system that can manage excessive ROS accumulation and associated damage. The recovery signals  
372 regulating *RBOHD* are unclear, but it is likely to be under hormonal control.

373 Our work also highlighted dehydration stress and accelerated senescence as deterrents to  
374 recovery. Plants recovering from flooding often experience physiological drought due to impaired root  
375 hydraulics and/or leaf water loss (9, 13, 48, 49). Tolerant Lp2-6 rosettes regulated water loss following  
376 de-submergence more effectively than Bay-0. The inferior hydration status of Bay-0 correlated with  
377 earlier stomatal re-opening 3 hours following de-submergence. The smaller stomatal apertures of Lp2-  
378 6 most probably counteracted dehydration during recovery. The Ribo-seq data and hormone  
379 measurements indicated a stronger ABA response in Bay-0, conflicting with the role of ABA in  
380 promoting stomatal closure in response to drought signals. However, the Ribo-seq data also revealed  
381 a possible role for ethylene signaling in mediating recovery differences between the accessions (Fig.  
382 2C). Ethylene is a senescence-promoting hormone that can antagonize ABA action on stomatal  
383 closure (50). Elevated ethylene production following de-submergence in Bay-0 corresponded with both  
384 an earlier stomatal reopening and greater chlorophyll loss, since chemical inhibition of ethylene  
385 signaling during recovery reversed both traits. We suggest that ethylene action is mediated through  
386 the EIN3 target genes, *SAG113* and *ORE1*, identified as accession-specific regulated genes with  
387 higher transcript abundance in Bay-0 during recovery. Accordingly, knockout mutants in the Col-0 wild-  
388 type background, with intermediary submergence tolerance (29), showed improved recovery following  
389 de-submergence, associated with improved water loss and reduced senescence. Although previous  
390 work on *Arabidopsis* seedlings recovering from anoxic stress (8) revealed that ethylene is beneficial for  
391 recovery, our data indicate a negative role for ethylene in submergence recovery. Since ACC  
392 conversion to ethylene requires oxygen, ethylene production is limited by anoxic conditions during  
393 prolonged submergence (51). Higher ethylene production in Bay-0 upon de-submergence might imply  
394 more ACC accumulation during submergence. Upon re-oxygenation, ethylene formation mediated by  
395 ACC synthase and oxidase enzymes may accelerate dehydration and senescence by inducing *ORE1*  
396 and *SAG113*.

397 The increase in *SAG113* transcript abundance following de-submergence was reduced upon  
398 application of an ABA antagonist indicating ABA regulation of this gene (Fig S5A). This implied that  
399 high ABA levels in Bay-0 would promote stomatal opening via *SAG113* upregulation, rather than  
400 closure, which appears counterintuitive. However, this may reflect interplay between ABA and ethylene  
401 signaling pathways. The induction of *SAG113* in Bay-0 could be a means to accelerate senescence of  
402 older leaves to remobilize resources to younger leaves, and possibly meristematic regions for new leaf  
403 development. How ethylene and ABA interactions influence recovery is an interesting area for future  
404 research.

405 Based on our findings, we propose a signaling network that regulates submergence recovery.  
406 Following de-submergence, dehydration caused by reduced root function and re-oxygenation generate  
407 the submergence recovery signals ROS, ABA, and ethylene that elicit downstream signaling pathways  
408 regulating various aspects of recovery (Fig. 8). Recovery signaling requires *RBOHD*-mediated ROS  
409 production, but this must be transient to prevent subsequent oxidative damage and photoinhibition.  
410 ABA and ethylene signaling likely interact to control stomatal opening, dehydration and senescence  
411 through regulation of genes such as *SAG113* and *ORE1*. This work provides key new insights into the  
412 highly regulated processes following de-submergence that limit recovery of Bay-0 and bolster survival  
413 of Lp2-6, emphasizing selection on mechanisms enhancing the return to homeostasis.

414

415

## 416 **Materials and Methods**

### 417 **Plant Growth and Submergence Treatment**

418 *Arabidopsis* seeds were obtained from the Nottingham Arabidopsis Stock Centre (NASC, UK) or  
419 received from the listed individual: Bay-0 (accession CS22633), Lp2-6 (accession CS22595), Col-0,  
420 *rbohD-3* (N9555, containing a single dSpm transposon insertion, received from Ron Mittler, University  
421 of North Texas) (27), *sag113* (SALK\_142672C, containing a T-DNA insertion) (34), *ore1*  
422 (SALK\_090154, containing a T-DNA insertion) (35). All mutants were in the Col-0 wild-type



423 background and were genotyped to confirm the presence of the insertion (Table S1). Seeds were  
424 sown on a 1:2 part soil:perlite mixture, stratified (4 d in the dark, 4°C), and under short-day light  
425 conditions [9 h light, 20°C, 180  $\mu\text{mol m}^{-2} \text{s}^{-1}$  photosynthetically active radiation (PAR), 70% relative  
426 humidity (RH)]. At 2-leaf stage, seedlings were transplanted into pots with the same soil mixture  
427 covered with a mesh. For submergence, disinfected tubs were filled with water for overnight  
428 temperature equilibrium to 20°C. Homogeneous 10-leaf stage plants were submerged at 10:00 AM (2  
429 h after the start of the photoperiod) at 20 cm water depth in a dark 20°C temperature-controlled  
430 climate room. After 5 d of submergence, de-submerged plants were replaced in normal growth  
431 conditions to follow post-submergence recovery.

#### 432 **Chlorophyll and Dry Weight**

433 Chlorophyll was extracted from whole rosettes or only intermediate leaves with 96% (v/v) DMSO dark-  
434 incubated at 65°C and cooled to RT. Absorbance at 664, 647, and 750 nm was measured with a  
435 spectrophotometer plate reader (Synergy HT Multi-Detection Microplate Reader; BioTek Instruments  
436 Inc., USA). Chlorophyll a and b concentrations were calculated following the equations of (52).  
437 Rosettes and leaves were dried in a 70°C oven for 2 d for dry weight measurements.  
438

#### 439 **Seed Yield**

440 Control and de-submerged plants grown in short-day conditions were watered daily until the terminal  
441 bud stopped flowering, and removed from high humidity conditions for drying until all siliques turned  
442 brown. Seeds were collected from individual plants and weighed.  
443

#### 444 **Shoot and Root Grafting**

445 Grafting methods were based on (53). Sterilized seeds sown on ½ MS plates containing 1% (w/v) agar  
446 and 0.5% (w/v) sucrose were stratified (3 d in the dark, 4°C) and grown under short-day light  
447 conditions for 6 d. Shoots and roots were grafted in a new ½ MS plate and vertically grown for 10 d.  
448 Adventitious roots were excised before transplanting seedlings into mesh-covered pots containing 1:2  
449 parts soil:perlite. Plants were grown under short-day conditions until the 10-leaf stage for 5 d dark  
450 submergence.  
451

#### 452 **Chlorophyll Fluorescence (Fv/Fm) Measurements**

453 Fv/Fm was measured in intermediate leaves (leaf 5 of a 10-leaf stage rosette, where leaf 1 is the first  
454 true leaf after cotyledon development). Plants were dark-acclimated for 10 min before using a  
455 PAM2000 Portable Chlorophyll Fluorometer (Heinz Walz GmbH, Pfullingen, Germany). The sensor  
456 was placed at a 5 mm distance from the leaf. Leaves with an Fv/Fm below detection level were  
457 marked as dead.  
458

#### 459 **Starch Quantification**

460 Starch levels were measured in whole rosettes using a commercial starch determination kit  
461 (Boehringer, Mannheim, Germany) following the manufacturer's protocol.  
462

#### 463 **Ribo-seq Library Construction**

464 Four intermediate leaves of each rosette submerged for 5 d were frozen in liquid nitrogen at 0 h (10:00  
465 AM, immediately upon de-submergence) and 3 h of air-light recovery. Intermediate leaves of 10-leaf  
466 stage control plants were harvested at 0 h. 5 mL of packed tissue was used to isolate ribosome-  
467 protected fragments. Ribo-seq libraries were prepared following the methods of (54) and (55, 56).  
468 Ribo-seq libraries were multiplexed with 2 samples in each lane. Libraries were sequenced with a  
469 HiSEQ2500 (Illumina) sequencer with 50 bp single-end reading. Bioinformatic analyses are described  
470 in *SI Materials and Methods*.  
471

#### 472 **Malondialdehyde Measurements**

473 MDA was quantified using a colorimetric method modified from (57). Leaves were pulverized in 80%  
474 (v/v) ethanol and the supernatant was mixed with a reactant mixture of 0.65% (w/v) thiobarbituric acid

475 and 20% (w/v) trichloroacetic acid. After 30 min incubation at 95°C, absorbance was measured at 532  
476 and 600 nm with a spectrophotometer plate reader.

#### 477 **Electron Paramagnetic Resonance (EPR) Spectroscopy**

478 Intermediate leaves were harvested for each treatment (control, dark, and recovery following  
479 submergence) and incubated with a TMT-H (1-hydroxy-4-isobutyramido-2,2,6,6-tetramethyl-  
480 piperidinium) spin probe. The supernatant was measured on a Bruker Elexsys E500 spectrometer.  
481 Further details are listed in *SI Materials and Methods*.

482

#### 483 **Methyl Viologen Application**

484 Plants were sprayed methyl viologen (0, 15, 30, 45 µM) containing 0.1% (v/v) Tween-20 1 d before  
485 harvesting. Control plants were sprayed with 0.1% (v/v) Tween-20 to account for detergent effects.  
486 Plants were sprayed 3 times during the day, each time with 1 mL of solution.

487

#### 488 **Antioxidant Measurements**

489 Glutathione was measured with a Promega GSH-Glo Glutathione Assay kit (Madison, USA), following  
490 the manufacturer's procedure using 25-50 mg of fresh tissue. Ascorbate was measured using a kit  
491 from Megazyme (K-ASCO 01/14, Wicklow, Ireland), following the microplate assay procedure with 50-  
492 75 mg of fresh tissue.

493

#### 494 **Scoring New Leaf Development**

495 Leaves were scored as newly formed during recovery from submergence when emergence from the  
496 shoot meristem was clearly visible.

497

#### 498 **Application of Chemical Inhibitors of RBOHD, ABA, and Ethylene**

499 Upon de-submergence, shoots were sprayed with 400 µL of 200 µM DPI (Sigma-Aldrich, St. Louis,  
500 USA) containing 0.1% Tween-20 or 100 µM AA1 (C<sub>18</sub>H<sub>23</sub>N<sub>5</sub>OS<sub>2</sub>, product ID: F0544-0152, Life  
501 Chemicals Inc., Niagara-on-the-Lake, Canada) containing 0.1% (v/v) DMSO. Control plants were also  
502 sprayed with mock solution containing only 0.1% (v/v) Tween-20 or DMSO. Plants were sprayed again  
503 with 200 µL of DPI or AA1 30 min and 1 h after the first application. For 1-MCP gassing, plants placed  
504 in glass desiccators (22.5 L volume) were gassed with 5 ppm of 1-MCP (Rohm and Haas Company,  
505 Philadelphia, USA). Control plants were placed in a separate desiccator to control for humidity effects.  
506 After 15 min, plants were replaced in normal growth conditions. 5 ppm of 1-MCP was reapplied to the  
507 plants every 4 h during the first day after de-submergence.

508

#### 509 **Relative Water Content**

510 Four intermediate leaves per rosette were detached and fresh weight was recorded. Leaves were  
511 saturated in water, and saturated weight was measured after 24 h. Leaves were dried in an 80°C oven  
512 for 2 d before measuring dry weight. Relative water content was calculated by: [(fresh weight–dry  
513 weight)/(saturated weight–dry weight)]×100.

514

#### 515 **Rapid Dehydration Assays**

516 Excised rosettes were weighed hourly up to 8 h after cutting and placed in a controlled environment  
517 with ambient room temperature (22.3°C, 12 µmol m<sup>-2</sup> s<sup>-1</sup> PAR, 63% relative humidity).

518

#### 519 **Stomatal Imprints**

520 Adaxial sides of leaves were imprinted using a silicone-based dental impression kit  
521 (Coltène/Whaledent PRESIDENT light body ISO 4823; Altstätten, Switzerland). Leaves were gently  
522 pressed onto the silicone mixture and removed after solidification. Transparent nail polish was thinly  
523 brushed onto the impression and air-dried. Stomata were viewed on the nail polish impression under a  
524 Olympus BX50WI microscope (Tokyo, Japan). Stomatal aperture was reported as width (w) divided by  
525 length (l) and classified as open (w/l>0.25), partially open (w/l=0.1-0.25), or closed (w/l=0-0.10).

526 Stomatal measurement immediately upon de-submergence after 5 d of submergence was excluded  
527 since the mechanical stress of blotting wet leaves forced stomata to open in Lp2-6.

528

### 529 **ABA Treatment in Epidermal Peels**

530 Epidermal peels were obtained from intermediate leaves of 10-leaf stage rosettes 2 h after the light  
531 period began. The adaxial side of the leaf was placed on sticky tape, and the petiole was ripped  
532 towards the leaf to obtain a transparent film of the abaxial side. Epidermal peels were placed in  
533 potassium stomata opening buffer (50 mM KCl + 10 mM MES, pH 6.15) for 3 h under high light (180  
534  $\mu\text{mol m}^{-2} \text{s}^{-1}$  photosynthetically active radiation (PAR)) and incubated for 1 h in stomata closing buffer  
535 [2.5  $\mu\text{M}$   $\text{CaCl}_2$  + 10 mM MES (pH 6.15)] containing 0, 50, or 100  $\mu\text{M}$  ABA. Stomata on the epidermal  
536 peels were viewed under a microscope.

537

### 538 **ABA Extraction and Quantification**

539 Intermediate leaves (60-100 mg) were harvested after de-submergence and control samples were  
540 harvested at the same time. ABA was extracted as described in (58), quantified by liquid  
541 chromatography-mass spectrometry (LC-MS) on a Varian 320 Triple Quad LC-MS/MS. ABA levels  
542 were quantified from the peak area of each sample compared with the internal standard, normalized  
543 by fresh weight.

544

### 545 **Ethylene Emission Measurements**

546 Ethylene production was measured based on (51). 2 shoots were placed in a 10 mL glass vial and  
547 entrapped ethylene was allowed to escape for 2 min before tightly sealing the vials. After 5 h dark  
548 incubation, ethylene was collected with a 1 mL injection needle and measured with gas  
549 chromatography (Syntech GmbH, Kirchzarten, Germany).

550

### 551 **RNA Extraction and Quantitative Real-Time qPCR**

552 Total RNA was extracted following the Qiagen RNeasy mini kit protocol (Hilden, Germany). For qRT-  
553 PCR, single-stranded cDNA was synthesized from 1  $\mu\text{g}$  RNA using random hexamer primers  
554 (Invitrogen, Waltham, USA). qRT-PCR was performed on Applied Biosystems ViiA 7 Real-Time PCR  
555 System (Thermo Fisher Scientific) with SYBR Green MasterMix (Bio-Rad, Hercules, USA). Primers  
556 used are listed in Table S2. Relative transcript abundance was calculated using the comparative  $2^{-\Delta\Delta\text{CT}}$   
557 method (59) normalized to *ACTIN2*.

558

### 559 **Data deposition**

560 The data reported in this paper have been deposited in the Sequence Read Archive (SRA) database,  
561 <https://www.ncbi.nlm.nih.gov/sra> (SRA accession: SRP133870, temporary submission ID:  
562 SUB3744462).

563

### 564 **Acknowledgments**

565 At Utrecht University, we thank Rob Welschen for managing the growth facilities, Emilie Reinen and  
566 Zeguang Liu for genotyping mutant lines, and Yorrit van de Kaa for seed harvesting. We appreciate  
567 Timo Staffel at the University of Kiel for assisting with plant growth for EPR measurements. We thank  
568 Thomas Girke of University of California, Riverside for guidance on the RiboSeq workflow in  
569 R/Bioconductor. This work was supported by grants to R.S. from the Netherlands Organisation for  
570 Scientific Research (NWO 016.VIDI.171.006, and NWO-VENI 863.12.013 and grants to J.B.-S. from  
571 the US. National Science Foundation (MCB-1021969) and the US Department of Agriculture National  
572 Institute of Food and Agriculture Hatch program. E.Y. was supported by a PhD scholarship from  
573 Utrecht University.

574

### 575 **References**

- 576 1. Bailey-Serres J, Lee SC, Brinton E (2012) Waterproofing crops: effective flooding survival  
577 strategies. *Plant Physiol* 160(4):1698–1709.
- 578 2. Voeselek LACJ, Bailey-Serres J (2015) Flood adaptive traits and processes: an overview. *New*

- 579 *Phytol* 206(1):57–73.
- 580 3. Hirabayashi Y, et al. (2013) Global flood risk under climate change. *Nat Clim Chang* 3(9):816–  
581 821.
- 582 4. Jackson MB (1985) Ethylene and responses of plants to soil waterlogging and submergence.  
583 *Annu Rev Plant Physiol* 36(1):145–174.
- 584 5. Armstrong W (1980) Aeration in higher plants. *Adv Bot Res* 7:225–332.
- 585 6. Maurel C, Simonneau T, Sutka M (2010) The significance of roots as hydraulic rheostats. *J Exp*  
586 *Bot* 61(12):3191–3198.
- 587 7. Tamang BG, Magliozzi JO, Maroof MAS, Fukao T (2014) Physiological and transcriptomic  
588 characterization of submergence and reoxygenation responses in soybean seedlings. *Plant*  
589 *Cell Environ* 37(10):2350–2365.
- 590 8. Tsai K, Chou S, Shih M (2014) Ethylene plays an essential role in the recovery of *Arabidopsis*  
591 during post-anaerobiosis reoxygenation. *Plant Cell Environ* 37(10):2391–2405.
- 592 9. Fukao T, Yeung E, Bailey-Serres J (2011) The submergence tolerance regulator SUB1A  
593 mediates crosstalk between submergence and drought tolerance in rice. *Plant Cell* 23:412–  
594 427.
- 595 10. Ella ES, Kawano N, Ito O (2003) Importance of active oxygen-scavenging system in the  
596 recovery of rice seedlings after submergence. *Plant Sci* 165(1):85–93.
- 597 11. Biemelt S, Keetman U, Albrecht G (1998) Re-aeration following hypoxia or anoxia leads to  
598 activation of the antioxidative defense system in roots of wheat seedlings. *Plant Physiol*  
599 116(2):651–658.
- 600 12. Monk LS, Fagerstedt K V, Crawford RM (1987) Superoxide dismutase as an anaerobic  
601 polypeptide: a key factor in recovery from oxygen deprivation in *Iris pseudacorus*? *Plant*  
602 *Physiol* 85(4):1016–1020.
- 603 13. Alpuerto JB, Hussain RMF, Fukao T (2016) The key regulator of submergence tolerance,  
604 *SUB1A*, promotes photosynthetic and metabolic recovery from submergence damage in rice  
605 leaves. *Plant Cell Environ* 39(3):672–684.
- 606 14. Khan MN, Komatsu S (2016) Characterization of post-flooding recovery-responsive enzymes in  
607 soybean root and hypocotyl. *J Plant Biol* 59(5):478–487.
- 608 15. Ye X, et al. (2016) Submergence causes similar carbohydrate starvation but faster post-stress  
609 recovery than darkness in *Alternanthera philoxeroides* plants. *PLoS One* 11(10):e0165193.
- 610 16. Yuan L, et al. (2017) Jasmonate regulates plant responses to reoxygenation through activation  
611 of antioxidant synthesis. *Plant Physiol* 173(3):1864–1880.
- 612 17. Tsai K, Lin C, Ting C, Shih M (2016) Ethylene-regulated glutamate dehydrogenase fine-tunes  
613 metabolism during anoxia-reoxygenation. *Plant Physiol* 172(3):1548–1562.
- 614 18. Ingolia NT, Ghaemmaghami S, Newman JRS, Weissman JS (2009) Genome-wide analysis in  
615 vivo of translation with nucleotide resolution using ribosome profiling. *Science* 324(5924):218–  
616 223.
- 617 19. Ingolia NT (2014) Ribosome profiling: new views of translation, from single codons to genome  
618 scale. *Nat Rev Genet* 15(3):205–213.
- 619 20. Juntawong P, Bailey-Serres J (2012) Dynamic light regulation of translation status in  
620 *Arabidopsis thaliana*. *Front Plant Sci* 3:66.
- 621 21. Branco-Price C, Kaiser KA, Jang CJH, Larive CK, Bailey-Serres J (2008) Selective mRNA  
622 translation coordinates energetic and metabolic adjustments to cellular oxygen deprivation and  
623 reoxygenation in *Arabidopsis thaliana*. *Plant J* 56(5):743–755.
- 624 22. Benina M, Ribeiro DM, Gechev TS, Mueller-Roeber B, Schippers JHM (2015) A cell type-  
625 specific view on the translation of mRNAs from ROS-responsive genes upon paraquat  
626 treatment of *Arabidopsis thaliana* leaves. *Plant Cell Environ* 38(2):349–363.
- 627 23. Cheng MC, et al. (2015) Increased glutathione contributes to stress tolerance and global  
628 translational changes in *Arabidopsis*. *Plant J* 83(5):926–939.
- 629 24. Sorenson R, Bailey-Serres J (2014) Selective mRNA translation tailors low oxygen energetics.  
630 *Low-Oxygen Stress in Plants*, eds van Dongen JT, Licausi F (Springer, Vienna), pp 95–115.
- 631 25. Dodge AD, Harris N (1970) The mode of action of paraquat and diquat. *Biochem J* 118(3):43P–  
632 44P.
- 633 26. Bus JS, Aust SD, Gibson JE (1974) Superoxide- and singlet oxygen-catalyzed lipid  
634 peroxidation as a possible mechanism for paraquat (methyl viologen) toxicity. *Biochem Biophys*  
635 *Res Commun* 58(3):749–755.
- 636 27. Torres MA, Dangl JL, Jones JDG (2002) *Arabidopsis* gp91phox homologues AtrbohD and  
637 AtrbohF are required for accumulation of reactive oxygen intermediates in the plant defense  
638 response. *Proc Natl Acad Sci USA* 99(1):517–522.

- 639 28. Tissier AF, et al. (1999) Multiple independent defective suppressor-mutator transposon  
640 insertions in Arabidopsis: a tool for functional genomics. *Plant Cell* 11(10):1841–1852.
- 641 29. Vashisht D, et al. (2011) Natural variation of submergence tolerance among *Arabidopsis*  
642 *thaliana* accessions. *New Phytol* 190(2):299–310.
- 643 30. Lee SC, et al. (2011) Molecular characterization of the submergence response of the  
644 *Arabidopsis thaliana* ecotype Columbia. *New Phytol* 190(2):457–471.
- 645 31. Chang KN, et al. (2013) Temporal transcriptional response to ethylene gas drives growth  
646 hormone cross-regulation in Arabidopsis. *Elife* 2013(2):1–20.
- 647 32. Kim HJ, et al. (2014) Gene regulatory cascade of senescence-associated NAC transcription  
648 factors activated by ETHYLENE-INSENSITIVE2-mediated leaf senescence signalling in  
649 *Arabidopsis*. *J Exp Bot* 65(14):4023–4036.
- 650 33. Zhang K, Gan S (2012) An abscisic acid-AtNAP transcription factor-SAG113 protein  
651 phosphatase 2C regulatory chain for controlling dehydration in senescing Arabidopsis leaves.  
652 *Plant Physiol* 158(2):961–969.
- 653 34. Zhang K, Xia X, Zhang Y, Gan S (2012) An ABA-regulated and Golgi-localized protein  
654 phosphatase controls water loss during leaf senescence in Arabidopsis. *Plant J* 69(4):667–678.
- 655 35. He X, et al. (2005) AtNAC2, a transcription factor downstream of ethylene and auxin signaling  
656 pathways, is involved in salt stress response and lateral root development. *Plant J* 44(6):903–  
657 916.
- 658 36. Balazadeh S, et al. (2010) A gene regulatory network controlled by the NAC transcription factor  
659 ANAC092/AtNAC2/ORE1 during salt-promoted senescence. *Plant J* 62(2):250–264.
- 660 37. Qiu K, et al. (2015) EIN3 and ORE1 accelerate degreening during ethylene-mediated leaf  
661 senescence by directly activating chlorophyll catabolic genes in *Arabidopsis*. *PLOS Genet*  
662 11(7):e1005399.
- 663 38. Buchanan-Wollaston V, et al. (2005) Comparative transcriptome analysis reveals significant  
664 differences in gene expression and signalling pathways between developmental and  
665 dark/starvation-induced senescence in Arabidopsis. *Plant J* 42(4):567–585.
- 666 39. Ye Y, et al. (2017) A novel chemical inhibitor of ABA signaling targets all ABA receptors. *Plant*  
667 *Physiol* 173(4):2356–2369.
- 668 40. Elstner EF, Osswald W (1994) Mechanisms of oxygen activation during plant stress. *Proc R*  
669 *Soc Edinburgh* 102:131–154.
- 670 41. Smirnoff N (1995) Antioxidant systems and plant response to the environment. *Environment*  
671 *and Plant Metabolism: Flexibility and Acclimation* (BIOS Scientific Publishers, UK).
- 672 42. Huang S, Van Aken O, Schwarzländer M, Belt K, Millar AH (2016) The roles of mitochondrial  
673 reactive oxygen species in cellular signaling and stress response in plants. *Plant Physiol*  
674 171(3):1551–1559.
- 675 43. Baxter-Burrell A, Yang Z, Springer PS, Bailey-Serres J (2002) RopGAP4-dependent Rop  
676 GTPase rheostat control of *Arabidopsis* oxygen deprivation tolerance. *Science*  
677 296(5575):2026–2028.
- 678 44. Pucciariello C, Parlanti S, Banti V, Novi G, Perata P (2012) Reactive oxygen species-driven  
679 transcription in Arabidopsis under oxygen deprivation. *Plant Physiol* 159(1):184–196.
- 680 45. Mastroph A, et al. (2009) Profiling transcriptomes of discrete cell populations resolves altered  
681 cellular priorities during hypoxia in *Arabidopsis*. *Proc Natl Acad Sci USA* 106(44):18843–18848.
- 682 46. Yao Y, et al. (2016) ETHYLENE RESPONSE FACTOR 74 (ERF74) plays an essential role in  
683 controlling a respiratory burst oxidase homolog D (RbohD)-dependent mechanism in response  
684 to different stresses in Arabidopsis. *New Phytol* 213(4):1667–1681.
- 685 47. Akman M, Kleine R, van Tienderen PH, Schranz EM (2017) Identification of the submergence  
686 tolerance QTL Come Quick Drowning1 (CQD1) in *Arabidopsis thaliana*. *J Hered* 108(3):308–  
687 317.
- 688 48. Setter TLT, et al. (2010) Desiccation of leaves after de-submergence is one cause for  
689 intolerance to complete submergence of the rice cultivar IR 42. *Funct Plant Biol* 37(11):1096–  
690 1104.
- 691 49. Shahzad Z, et al. (2016) A potassium-dependent oxygen sensing pathway regulates plant root  
692 hydraulics. *Cell* 167(1):87–98.e14.
- 693 50. Tanaka Y, et al. (2005) Ethylene inhibits abscisic acid-induced stomatal closure in Arabidopsis.  
694 *Plant Physiol* 138(4):2337–2343.
- 695 51. Voesenek LACJ, et al. (2003) De-submergence-induced ethylene production in *Rumex*  
696 *palustris*: regulation and ecophysiological significance. *Plant J* 33(2):341–352.
- 697 52. Porra RJ, Thompson WA, Kriedemann PE (1989) Determination of accurate extinction  
698 coefficients and simultaneous equations for assaying chlorophylls a and b extracted with four

- 699 different solvents: verification of the concentration of chlorophyll standards by atomic  
700 absorption spectroscopy. *Biochim Biophys Acta - Bioenerg* 975(3):384–394.
- 701 53. Marsch-Martínez N, et al. (2013) An efficient flat-surface collar-free grafting method for  
702 *Arabidopsis thaliana* seedlings. *Plant Methods* 9(1):14.
- 703 54. Ingolia NT, Brar GA, Rouskin S, McGeachy AM, Weissman JS (2012) The ribosome profiling  
704 strategy for monitoring translation in vivo by deep sequencing of ribosome-protected mRNA  
705 fragments. *Nat Protoc* 7(8):1534–1550.
- 706 55. Juntawong P, Girke T, Bazin J, Bailey-Serres J (2014) Translational dynamics revealed by  
707 genome-wide profiling of ribosome footprints in *Arabidopsis*. *Proc Natl Acad Sci USA*  
708 111(1):E203–E212.
- 709 56. Juntawong P, Hummel M, Bazin J, Bailey-Serres J (2015) Ribosome profiling: a tool for  
710 quantitative evaluation of dynamics in mRNA translation. *Plant Functional Genomics* (Humana  
711 Press, New York), pp 139–173.
- 712 57. Stewart RR, Bewley JD (1980) Lipid peroxidation associated with accelerated aging of soybean  
713 axes. *Plant Physiol* 65(2):245–8.
- 714 58. Zhang NX, et al. (2018) Phytophagy of omnivorous predator *Macrolophus pygmaeus* affects  
715 performance of herbivores through induced plant defences. *Oecologia* 186(1):101–113.
- 716 59. Livak KJ, Schmittgen TD (2001) Analysis of relative gene expression data using real-time  
717 quantitative PCR and the 2(-Delta Delta C(T)) method. *Methods* 25(4):402–408.
- 718 60. Backman TWH, Girke T (2016) systemPipeR: NGS workflow and report generation  
719 environment. *BMC Bioinformatics* 17:388.
- 720 61. Juntawong P, Bazin J, Hummel M, Bailey-Serres J, Girke T (2015) systemPipeR workflow for  
721 Ribo-seq and polyRibo-seq experiments. Available at [www.bioconductor.org/](http://www.bioconductor.org/). Accessed  
722 January 1, 2018.
- 723 62. Steffens B, Steffen-Heins A, Sauter M (2013) Reactive oxygen species mediate growth and  
724 death in submerged plants. *Front Plant Sci* 4:179.

725  
726  
727  
728

## Figure Legends

729 **Fig. 1.** Effects of complete submergence on subsequent recovery in two *Arabidopsis* accessions  
730 Bay-0 and Lp2-6. (A) Representative shoots of Bay-0 and Lp2-6 before submergence (pre-sub), after  
731 5 d of dark submergence (0 d), and 1, 3, and 5 d of recovery. (B) Chlorophyll content of whole rosettes  
732 (n=9-10). (C) Total seed output of individual control and submergence recovery plants (n=10-15). (D)  
733 Shoot dry weight of grafted plants submerged for 5 d and recovered for another 5 d under control  
734 conditions. Grafting combinations represent the accession of the shoot/root (B=Bay-0; L=Lp2-6)  
735 (n=45-60). (E) Chlorophyll content in intermediate leaves (n=15). (F) Maximum quantum efficiency of  
736 photosystem II (Fv/Fm) in intermediate leaves (n=10). (G) Starch content in whole rosettes (n=3). Data  
737 represent mean  $\pm$  SEM from independent experiments. Significant difference is denoted by different  
738 letters ( $p < 0.05$ , one- or two-way ANOVA with Tukey's multiple comparisons test).

739  
740 **Fig. 2.** Submergence and recovery induce distinct changes in ribosome-associated transcripts. (A)  
741 Overview of Ribo-seq experimental design and treatment comparisons. Bay-0 and Lp2-6 intermediate  
742 leaves were harvested before treatment (control=cont), 5 d dark submergence (submergence=sub),  
743 and 3 h after de-submergence (recovery=rec). The submergence effect was investigated by  
744 comparing 5 d submergence-treated samples to the 0 h control ("submergence comparison"). Both  
745 samples were harvested at the same time during the photoperiod. The recovery effect was a  
746 comparison of 5 d submerged samples to those recovered for 3 h in control air and light conditions  
747 after de-submergence ("recovery comparison"). The combined effect of submergence and recovery  
748 was determined by comparing de-submerged 3 h recovery plants with 0 h control plants ("combined  
749 response"). (B) Scatterplots comparing Bay-0 and Lp2-6 log<sub>2</sub>FC under the "submergence comparison,"  
750 "recovery comparison," and "combined response." Red dots represent accession  $\times$  treatment DEGs  
751 ( $P_{\text{adj}} < 0.05$ ) and black dots are remaining DEGs. (C) Fuzzy K-means clustering of genes showing  
752 different behavior in Bay-0 and Lp2-6. Control (0 h, cont), submergence (5 d, sub), and recovery (3 h,  
753 rec) conditions were individually plotted as black lines using scaled and normalized RPKM values, and  
754 the total number of DEGs in each cluster is noted. GO enrichment for each cluster was visualized as a  
755 heatmap.

756  
757  
758  
759  
760  
761  
762  
763  
764  
765  
766  
767  
768  
769  
770  
771  
772  
773  
774  
775  
776  
777  
778  
779  
780  
781  
782  
783  
784  
785  
786  
787  
788  
789  
790  
791  
792  
793  
794  
795  
796  
797  
798  
799  
800  
801  
802  
803  
804  
805  
806  
807

**Fig. 3.** Lp2-6 effectively contains oxidative stress resulting from excessive ROS during recovery. (A) Malondialdehyde (MDA) content of Bay-0 and Lp2-6 rosettes before submergence (pre-sub), after 5 d of submergence (0 h), and during subsequent recovery (n=7). (B) Electron paramagnetic resonance (EPR) spectroscopy quantified ROS in Bay-0 and Lp2-6 intermediate leaves of control or recovering plants after 5 d of submergence (n=30). Asterisks represent significant difference (p<0.05) between submerged accessions at the specified time point. (C) MDA content of rosettes with varying concentrations of exogenously applied methyl viologen (n=7). (D) Glutathione and (E) ascorbate content in intermediate leaves recovering from 5 d of submergence (n=3). Data represent mean ± SEM. In all panels, except B, significant difference is denoted by different letters (p<0.05, one- or two-way ANOVA with Tukey's multiple comparisons test).

**Fig. 4.** Post-submergence ROS formation mediated through *RBOHD* regulates recovery. (A) MDA content (n=12), (B) chlorophyll content (n=12), and (C) new leaf formation of *rbohD* and Col-0 (n=30) rosettes during recovery following 5 d of submergence. (D) MDA content (n=20), (E) chlorophyll content (n=20) and (F) new leaf formation (n=20) of Bay-0 plants with or without diphenyleneiodonium (DPI) application upon de-submergence. (G) MDA content (n=20), (H) chlorophyll content (n=20) and (I) new leaf formation during recovery of Lp2-6 plants sprayed with or without DPI upon de-submergence (n=20). Data represent mean ± SEM. Asterisks represent a significant difference between the two accessions at the specified time point (p<0.05, two-way ANOVA with Sidak's multiple comparisons test). Significant difference is denoted by different letters or (p<0.05, two-way ANOVA with Tukey's multiple comparisons test).

**Fig. 5.** Higher desiccation stress in Bay-0 corresponds with earlier stomatal opening during recovery. (A) Relative water content in intermediate leaves before submergence (pre-sub), after 5 d of submergence (0 h), and subsequent recovery time points (n=15). (B) Hourly water loss of 10-leaf stage rosettes after detachment from roots immediately upon de-submergence (0 h) compared to the initial fresh weight (n=30). (C) Stomatal width aperture (based on width/length ratio) measured using stomatal imprints on the adaxial side of intermediate leaves (n=85-227) of plants before treatment (pre-sub), after 5 d of submergence (0 h), and subsequent recovery time points. (D) Stomatal aperture of epidermal peels from intermediate leaves of plants grown under control conditions and incubated in 0, 50, or 100 μM ABA (n=180). (E) ABA quantification in intermediate leaves of Bay-0 and Lp2-6 recovering from 5 d of submergence and corresponding controls (n=3). Data represent mean ± SEM. Different letters represent significant difference and asterisks represent significant differences between the accessions at the specified time point (p<0.05, (B) two-way ANOVA with Tukey's multiple comparisons test, (E) one-way ANOVA with planned comparisons on log-transformed data).

**Fig. 6.** Dehydration and accelerated senescence in Bay-0 upon de-submergence is linked to higher ethylene evolution during recovery. (A) Ethylene emissions from Bay-0 and Lp2-6 shoots after de-submergence (n=4-5). (B) Stomatal classification at 3 or 6 h after de-submergence of Bay-0 plants treated with or without the ethylene perception inhibitor 1-MCP (n=280-300). (C) Chlorophyll content in whole rosettes of Bay-0 treated with or without 1-MCP (n=5-6). 1-MCP treatment was imposed immediately upon de-submergence. Data represent mean ± SEM. Different letters represent significant difference (p<0.05, two-way ANOVA with Tukey's multiple comparisons test).

**Fig. 7.** Ethylene-mediated dehydration and senescence in Bay-0 post-submergence links to the induction of *SAG113* inhibiting stomatal closure and *ORE1* promoting chlorophyll breakdown. Relative mRNA abundance of *SAG113* (A) and *ORE1* (B) measured by qRT-PCR in Bay-0 and Lp2-6 intermediate leaves following de-submergence after 5 d of submergence (n=3 biological replicates). (C, D) Relative mRNA abundance of *SAG113* and *ORE1* measured by qRT-PCR in intermediate leaves of Bay-0 plants treated with and without 1-MCP (n=3-4 biological replicates). (E, F) Representative images of *sag113* (E) and *ore1* (F) mutants during recovery after 4 d of submergence compared to wild-type Col-0. (G) Stomatal classification at 3 and 6 h after de-submergence for *sag113*

808 and Col-0 submerged for 4 d (n=120-180). (H) Water loss in *sag113* and Col-0 after detachment from  
809 roots upon de-submergence compared to the initial fresh weight (n=4). (I) Chlorophyll content in whole  
810 rosettes of *ore1* and Col-0 after 5 d of recovery following 4 d of submergence (n=3). Data represent  
811 mean  $\pm$  SEM. Different letters represent significant difference and asterisks represent significant  
812 difference between the genotypes at the specified time point ( $p < 0.05$ , two-way ANOVA with Tukey's  
813 multiple comparisons test).

814  
815 **Fig. 8.** A signaling network mediating post-submergence recovery. Following prolonged  
816 submergence, the shift to a normoxic environment generates the post-submergence signals ROS,  
817 ethylene, and ABA. A ROS burst upon re-oxygenation occurs due to reduced scavenging and  
818 increased production in Bay-0 from several sources, including *RBOHD* activity. While excessive ROS  
819 accumulation is detrimental and can cause cellular damage, ROS-mediated signaling is required to  
820 trigger downstream processes that benefit recovery, including enhanced antioxidant capacity for ROS  
821 homeostasis. Signals triggering *RBOHD* induction following de-submergence are unclear, but  
822 hormonal control is most likely involved. Recovering plants experience physiological drought due to  
823 reduced root conductance, resulting in increased ABA levels post-submergence which can regulate  
824 stomatal movements to offset excessive water loss. High ethylene production in Bay-0 caused by ACC  
825 oxidation upon reaeration can counter drought-induced stomatal closure via induction of the protein  
826 phosphatase 2C *SAG113*, accelerating water loss and senescence. Higher transcript abundance of  
827 *SAG113* in Bay-0 is also positively regulated by ABA and could be a means to speed up water loss  
828 and senescence in older leaves. Ethylene also accelerates chlorophyll breakdown via the NAC TF  
829 *ORE1*. The timing of stomatal reopening during recovery is critical for balancing water loss with CO<sub>2</sub>  
830 assimilation and is likely regulated by post-submergence ethylene-ABA dynamics and signaling  
831 interactions.  
832



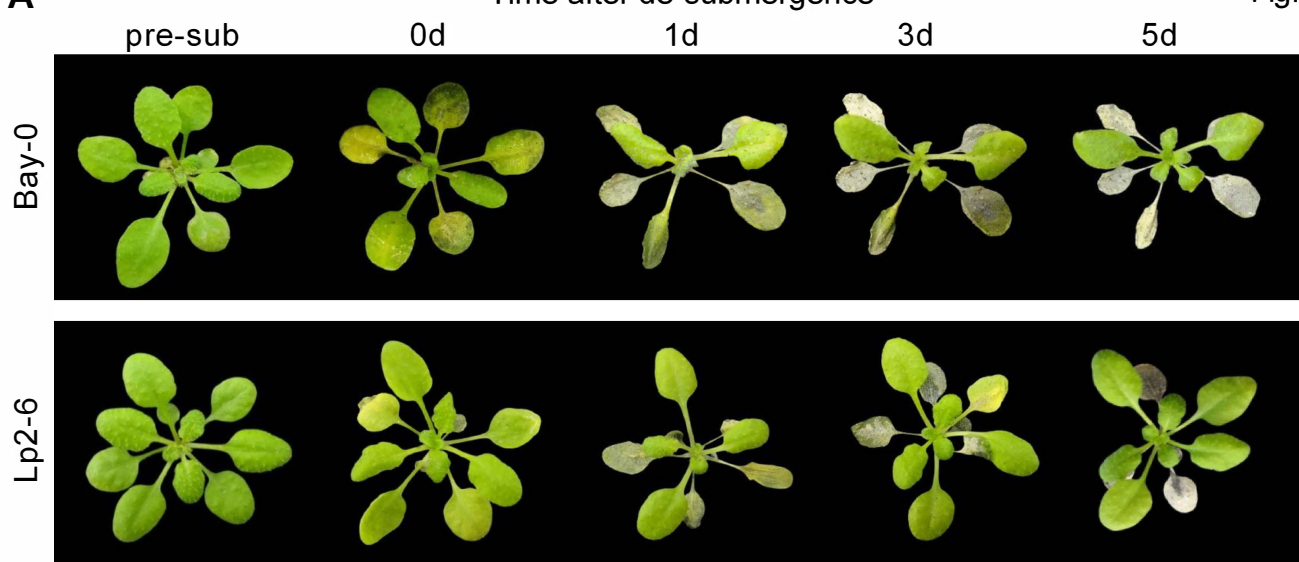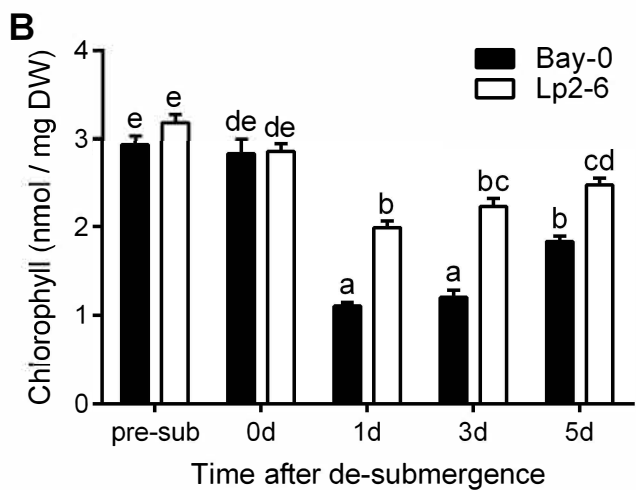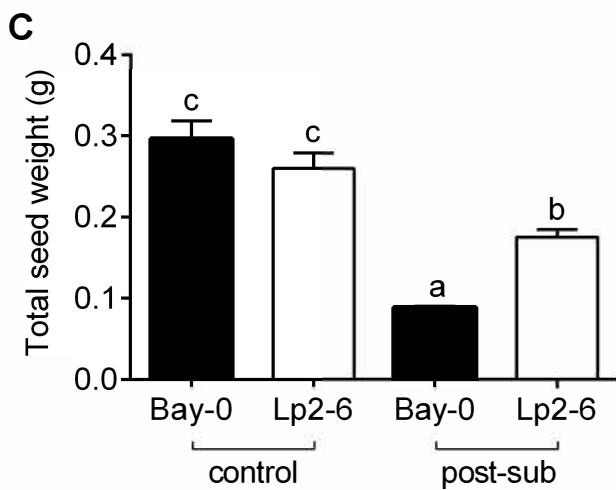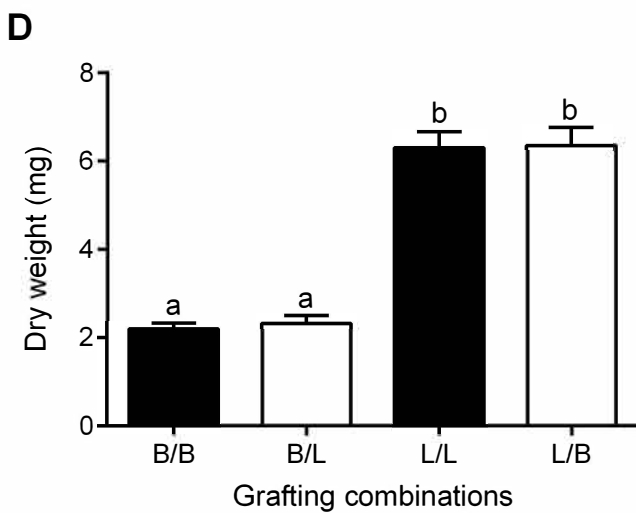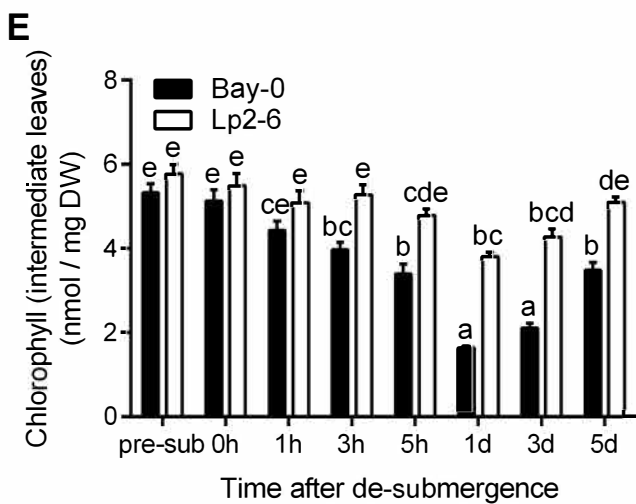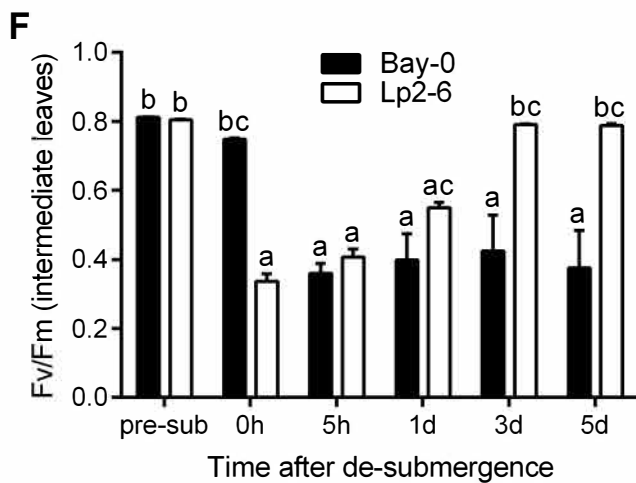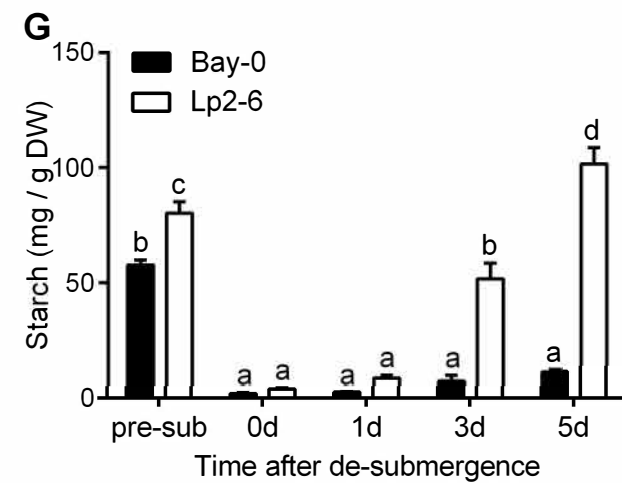

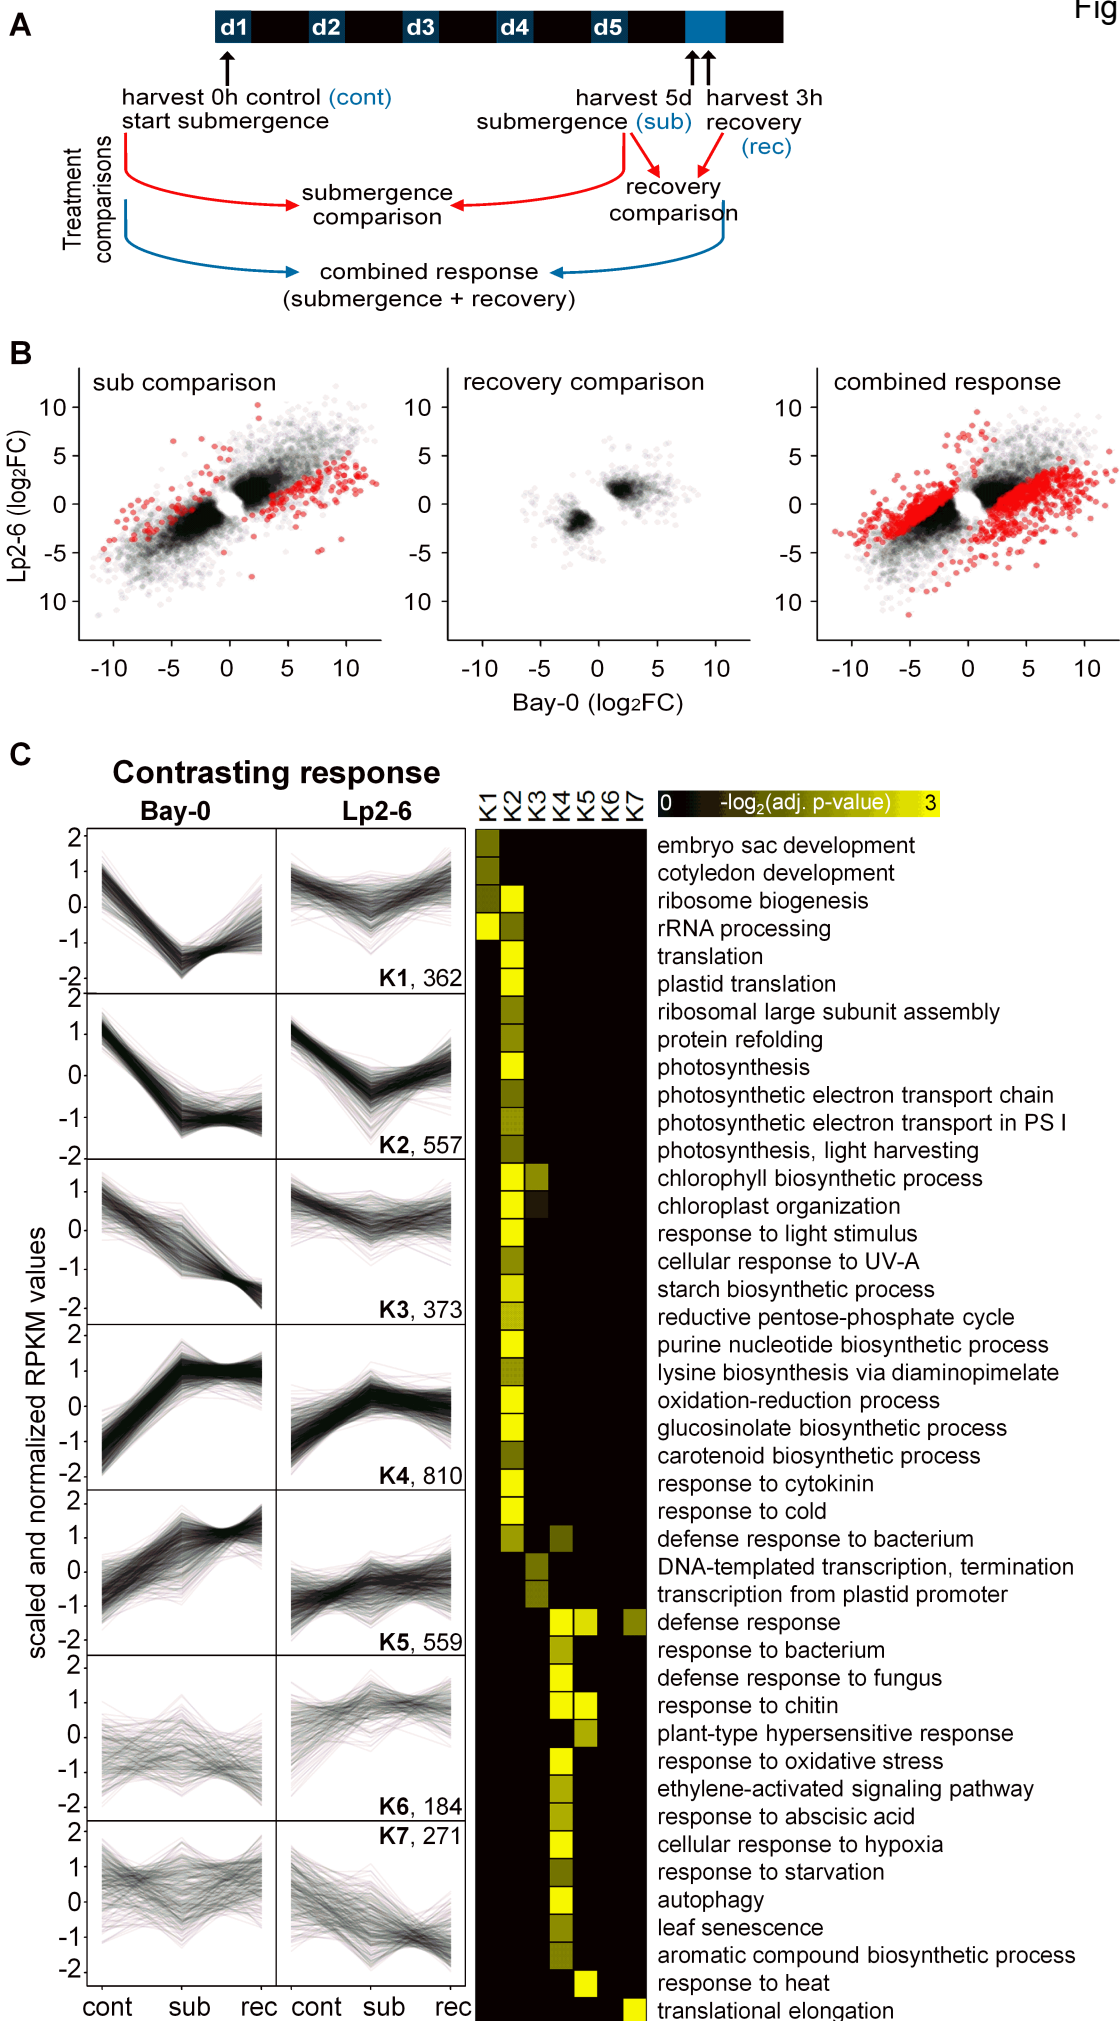

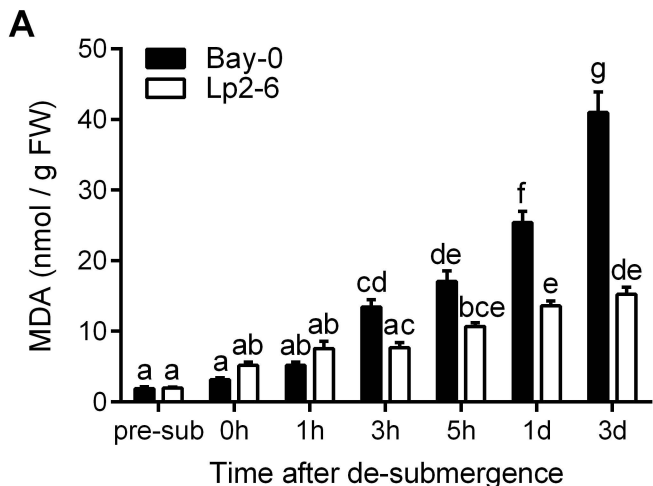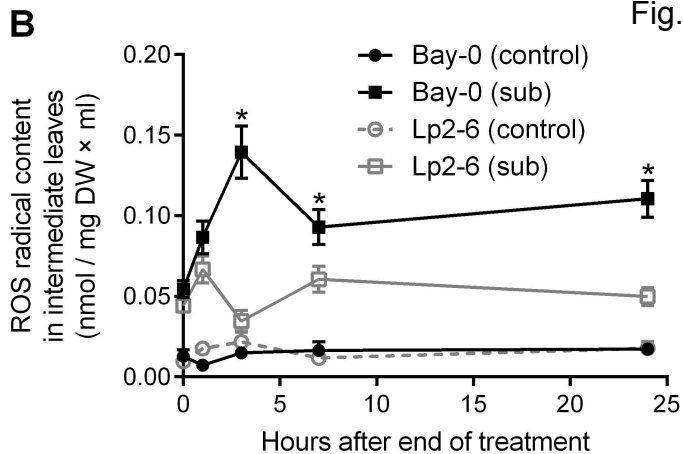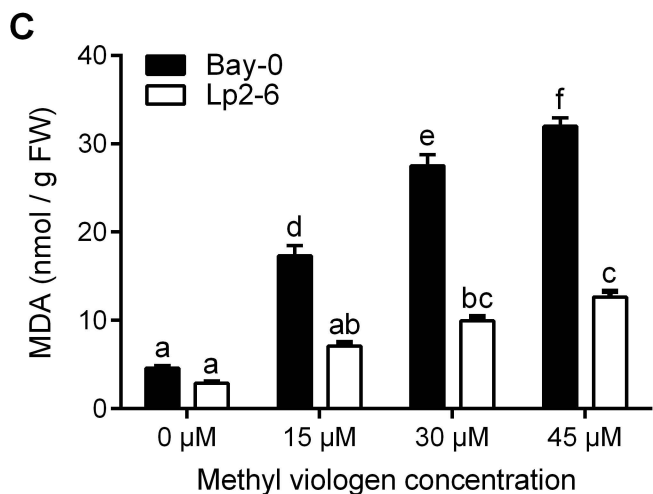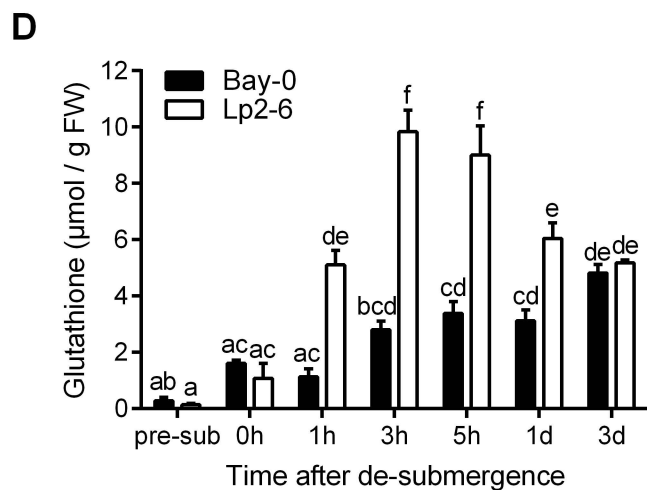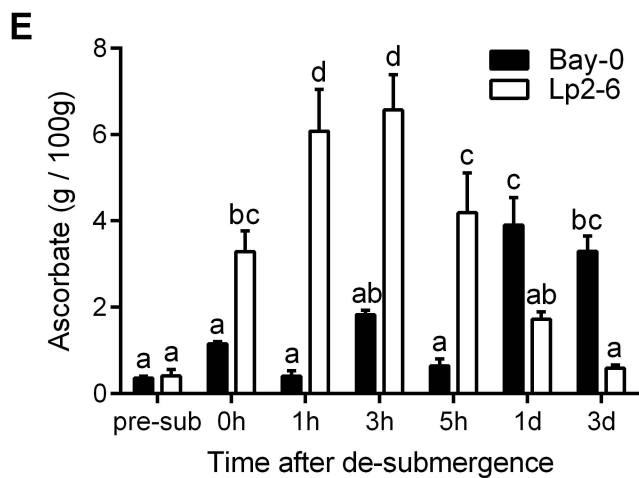

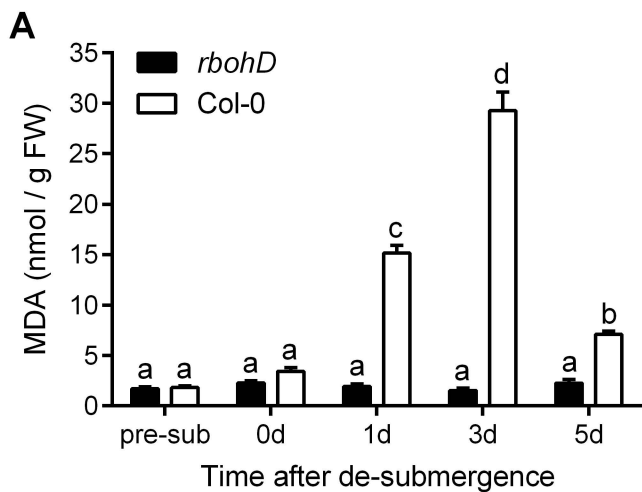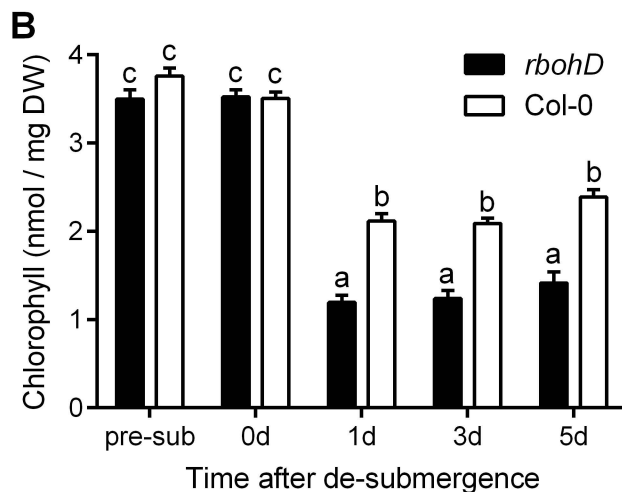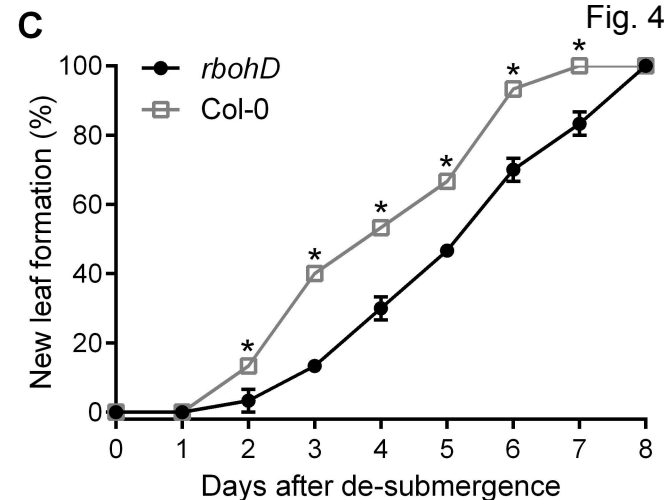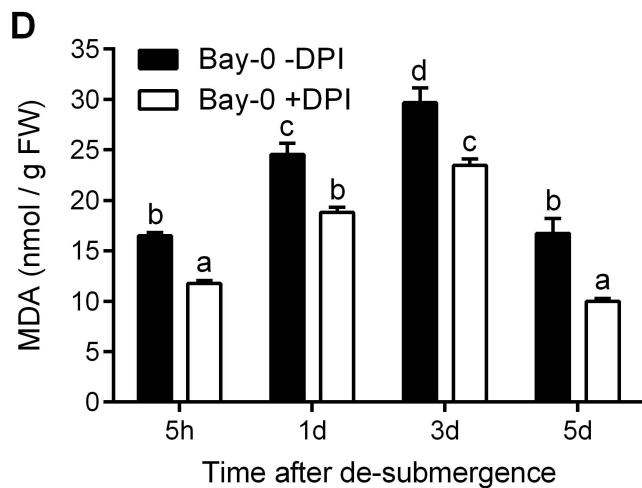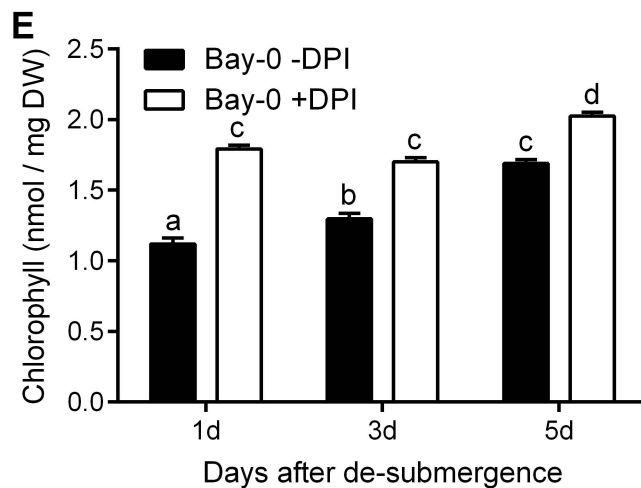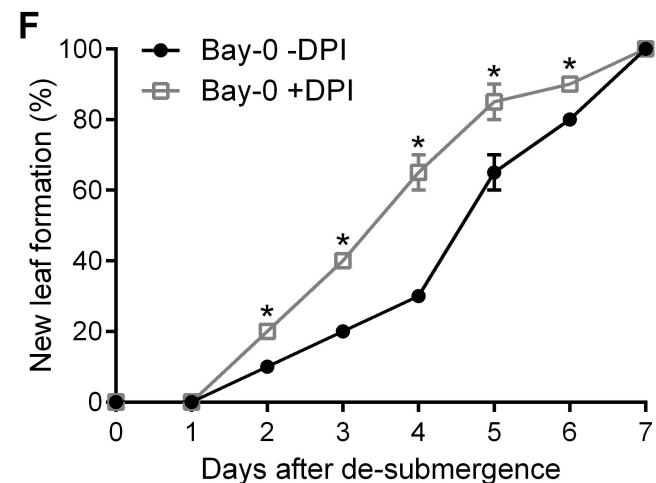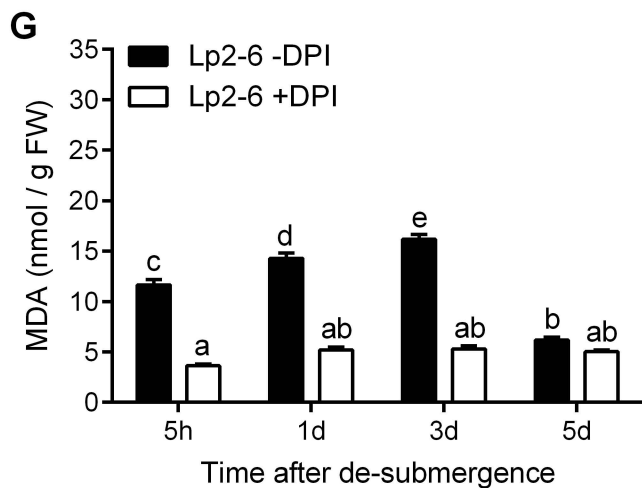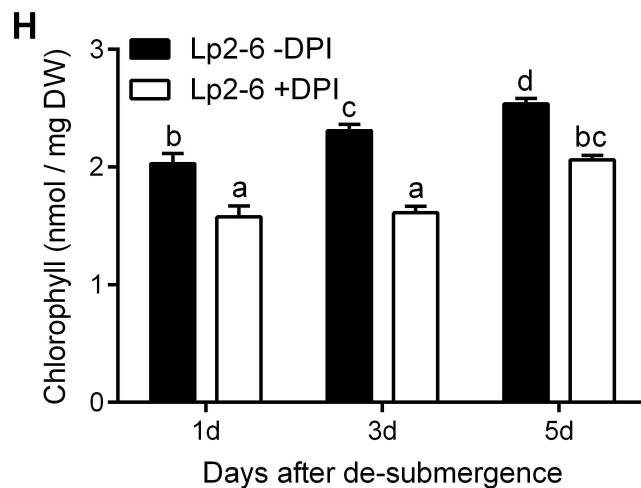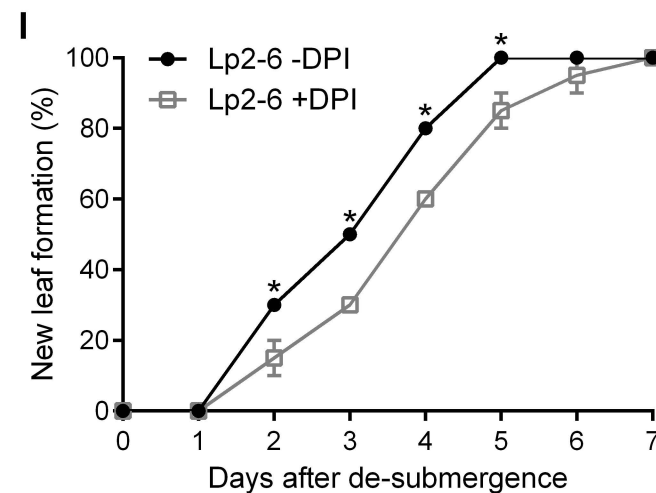

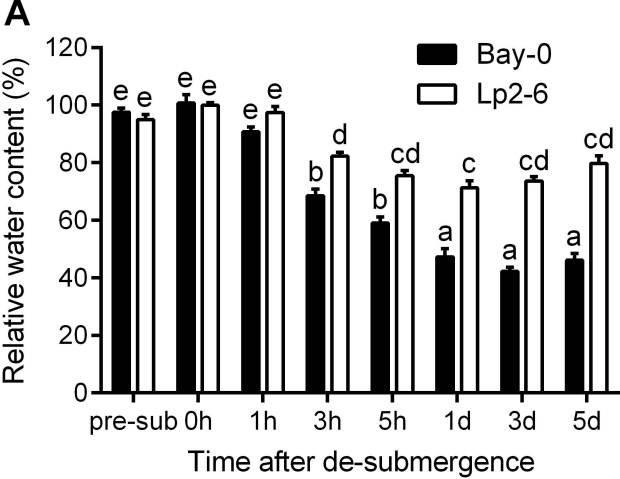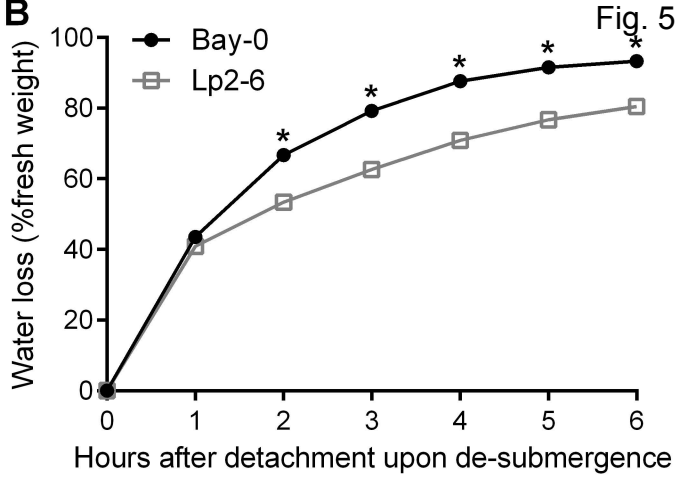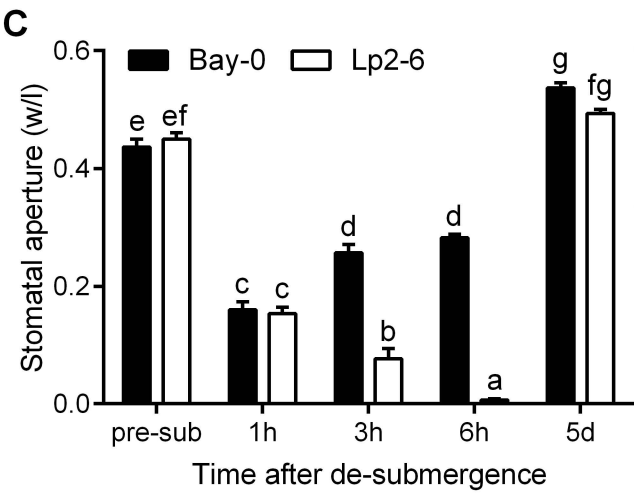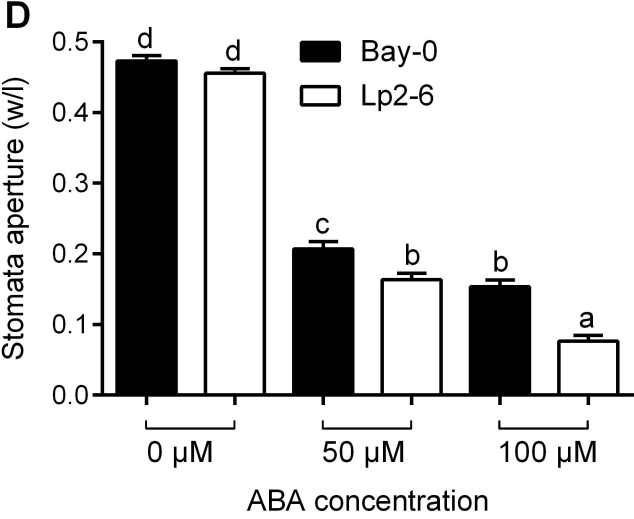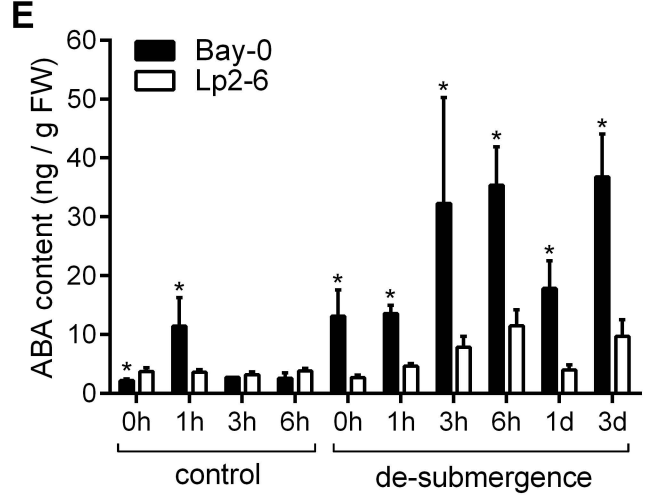

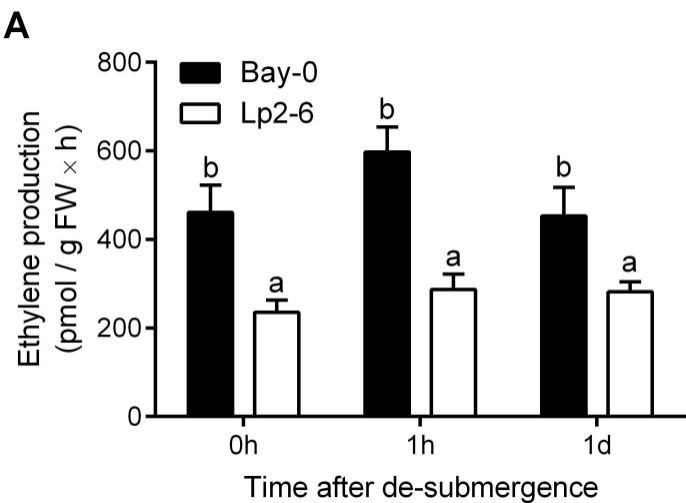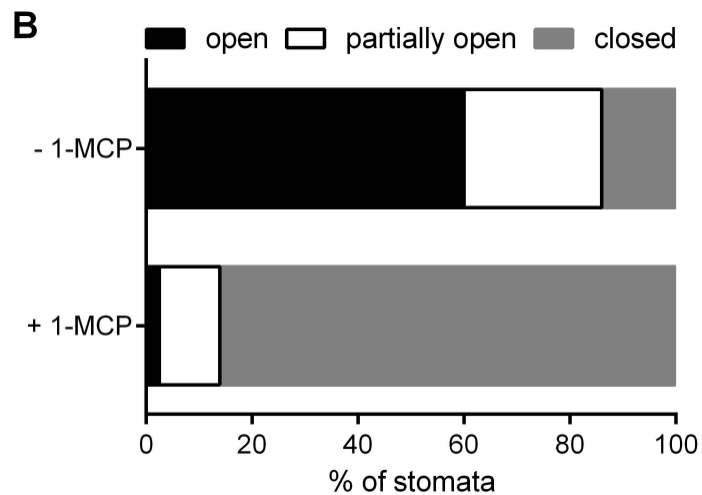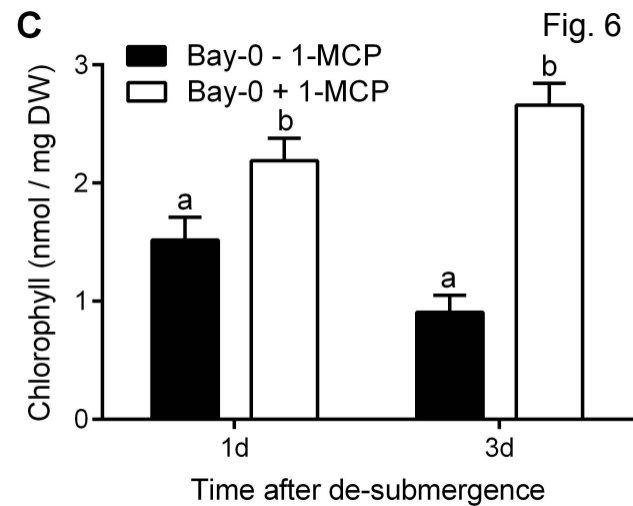

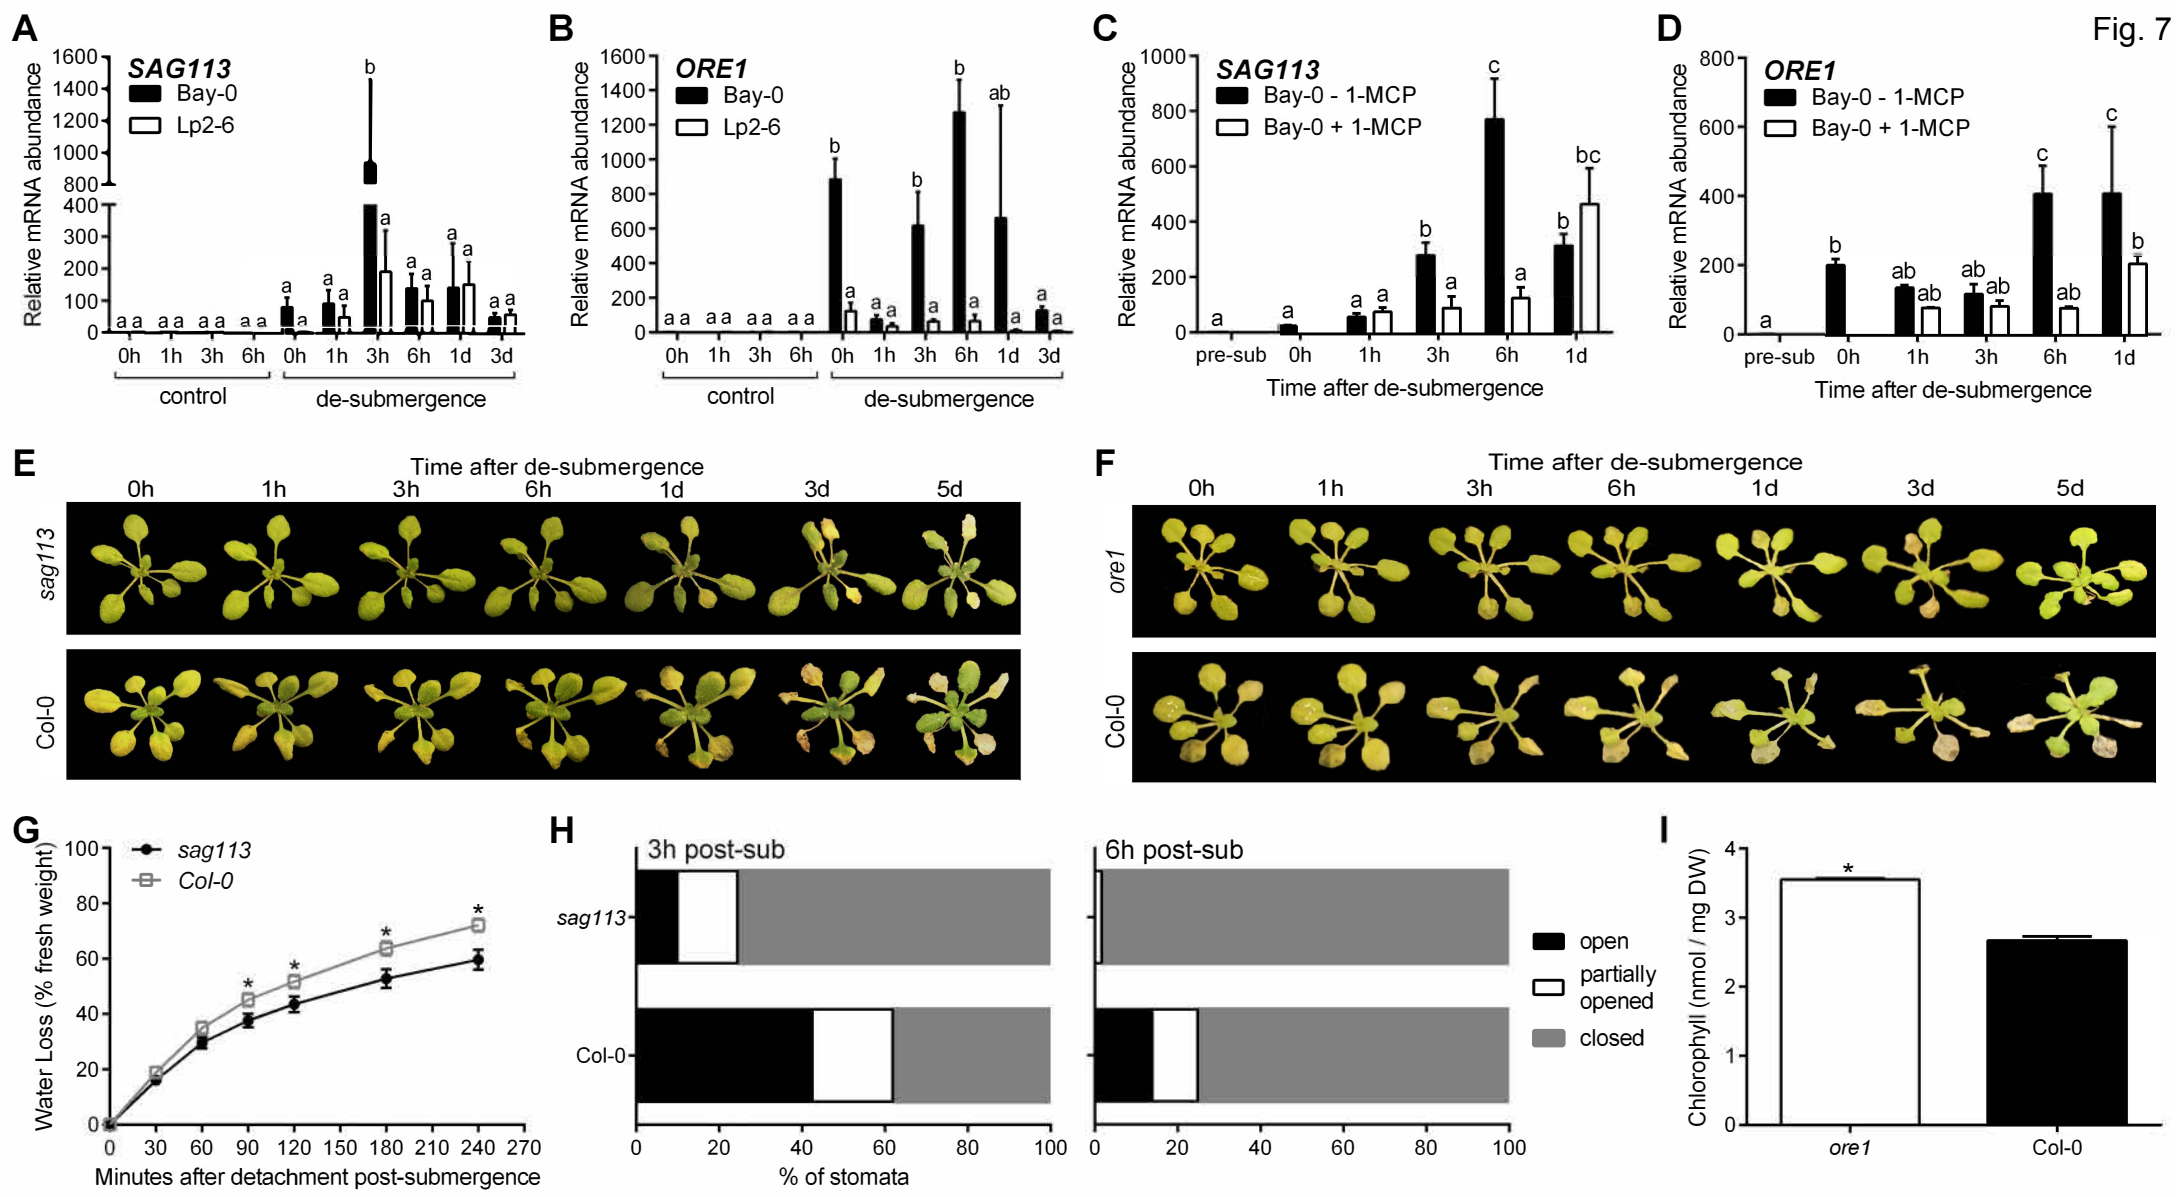

Fig. 8

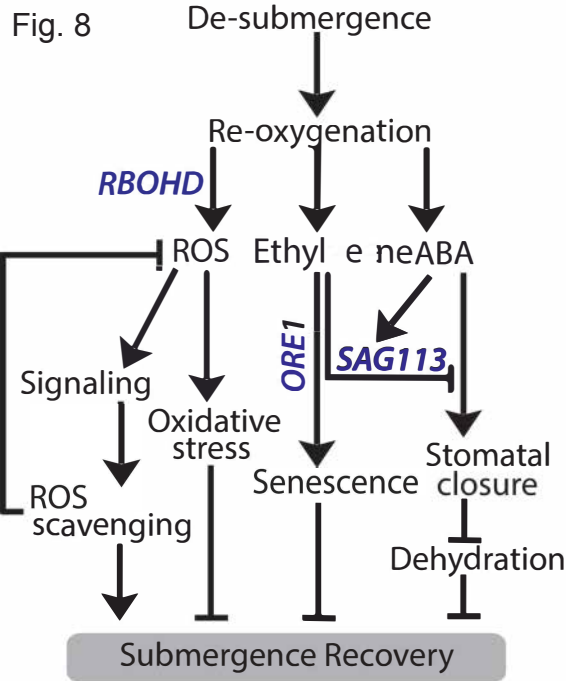



833 **Supporting Information**

834

835 **SI Materials and Methods**

836

837 **Dark Treatment**

838 10-leaf stage plants were placed in a dark climate chamber (20°C, 70% relative humidity) with well-  
839 maintained watering. After 5 d, plants were replaced in short-day light conditions.

840

841 **Ribo-seq Bioinformatics**

842 Data analysis was performed on a Linux cluster and R using command line tools, Bioconductor R  
843 packages, and custom R scripts. Some scripts were adapted from a systemPipeR Bioconductor R  
844 package for Ribo-seq experiments (60, 61). Adapters were trimmed from FASTQ files, and reads of 24  
845 to 36 nt were mapped to the *Arabidopsis thaliana* Col-0 genome (TAIR10/Araport11) in combination  
846 with the Araport11 annotation (GFF3 file, obtained from araport.org) using the TopHat and Bowtie2  
847 alignment algorithm (version 2.2.5) allowing 2 mismatches. For reads with multiple mapping, reads  
848 were first given priority to the transcriptome and also based on alignment quality score. Log<sub>2</sub> Fold  
849 Changes (log<sub>2</sub>FC) and Benjamini-Hochberg-corrected P-values were calculated using Bioconductor R  
850 packages “edgeR” and “limma.” Only genes with more than 15 reads in at least one sample were  
851 included. First, libraries were normalized for size and compositional bias with TMM normalization  
852 (trimmed mean of M-values). A generalized linear model with a full factorial design of treatment (3  
853 levels: control, submergence, and recovery) and accession (2 levels: Bay-0 and Lp2-6) was fitted to  
854 the TMM normalized read count data with a negative binomial distribution. Appropriate comparisons of  
855 the treatment, accession and interaction coefficients allowed the calculation of log<sub>2</sub>FC and significance  
856 for specific treatments, accession-specific treatment responses (accession × treatment interaction)  
857 and treatment-independent differences between the accessions. A MDS plot was created with  
858 “plotMDS” function within “edgeR” Bioconductor R packages. Samples distance was determined from  
859 the top 2000 differing genes in each pairwise comparison. Scatterplots of log<sub>2</sub>FC comparisons were  
860 plotted using custom plotting functions on R. Genes behaving similarly and differently in both  
861 accessions were separately clustered with fuzzy K-means clustering (R “cluster” library). RPKM values  
862 normalized for library composition (TMM, “edgeR”) were scaled so that for each gene, the average  
863 RPKM across all samples was zero and standard deviation was one. Scaled RPKM values were used  
864 for fuzzy K-means clustering using Euclidean distances metrics and a membership exponent of 1.2.  
865 Genes that best represent their cluster over the entire flooding period (Membership Score > 0.5) were  
866 used for visual representation of clustering output. These genes were tested for Gene Ontology (GO)  
867 enrichment using the “GOseq” Bioconductor package assuming a hypergeometric distribution and  
868 Benjamini-Hochberg-corrected P-values.

869

870 **Electron Paramagnetic Resonance (EPR) spectroscopy**

871 3 intermediate leaves were harvested for each treatment (control, dark, and recovery following  
872 submergence) and immediately snapped frozen in liquid N<sub>2</sub> (62). 150 µL of 1 mM TMT-H spin probe  
873 dissolved in 1 mM EDTA was added to each sample. Samples were incubated in a 40°C water bath  
874 for 90 min. 20 µL of supernatant was drawn up in a capillary tube for measurements on a Bruker  
875 Elexsys E500 spectrometer using the “Xepr acquisition and processing suite” software (Bruker  
876 Corporation, Billerica, Massachusetts). Measurements were performed at room temperature with the  
877 acquisition parameters: modulation frequency 100 kHz, modulation amplitude 1.3 G, receiver gain 60  
878 dB, time constant 81.92 ms, conversion time 40.11 ms, center field 3512.95 G, sweep width 66.8 G,  
879 sweep time 41.07 s, and attenuation 30 dB. A calibration curve for the EPR spectrometer  
880 measurement was obtained using a nitroxide radical TEMPO (2,2,6,6-tetramethyl-1-piperidinyloxy).  
881 Calculations from double integration of the low field peak yielded the limit of detection as 0.011 mmol/L  
882 and the limit of quantification as 0.038 mmol/L. The concentration of TMT radicals was calculated from  
883 the area of the double integration of the low-field peak, which was converted into TEMPO radical  
884 equivalents using the calibration curve. ROS concentration was calculated based on the TEMPO-  
885 equivalents and the Avogadro constant where 1 mol = 6.022 × 10<sup>23</sup> radicals, normalized by dry weight.

## 833 Supplemental Figure Legends

834

835 **Fig. S1.** Examining post-submergence recovery using a comparative *Arabidopsis* system. (A) Dry  
836 weight of whole rosettes during recovery after 5 d of dark submergence (n=9-10). (B) Percentage of  
837 plants forming new leaves during each day of recovery (n=32). Asterisks represent significant  
838 difference between the two accessions at the specified time points (p<0.05, two-way ANOVA). (C)  
839 Recovery of 10-leaf stage plants after 5 d of darkness as a control for dark submergence. (D)  
840 Representative images of grafted shoots after 5 d of submergence followed by recovery for 5 d.  
841 Images are shown for 0, 1, and 5 d of recovery. Sample groups represent the accession of the  
842 shoot/root. (E) Stomatal length measured on de-submerged intermediate leaves (n=83-227). (F)  
843 Stomatal density obtained from abaxial imprints of de-submerged intermediate leaves (n=12-29). Data  
844 represent mean  $\pm$  SEM. Different letters represent significant difference (p<0.05, two-way ANOVA with  
845 Tukey's multiple comparisons test).

846

847 **Fig. S2.** Ribo-seq pipeline for identifying post-submergence molecular mechanisms. (A)  
848 Representative 254 nm absorbance spectra of sucrose density gradient fractionated control  
849 (undigested) and RNase I digested polysomes. The x-axis corresponds to the gradient, with the  
850 orientation of sedimentation shown. The first two peaks at the left represent the 40S and 60S  
851 monosomes, followed by the 80S peak and the denser polysome peaks. mRNA regions protected by  
852 ribosomes from digestion (ribosome footprints) were isolated and constructed into cDNA libraries. (B)  
853 Illumina sequencing yielded high numbers of reads. Raw reads were unprocessed read output,  
854 trimmed reads were those with adapter sequences removed, and mapped reads were those aligning  
855 to the Araport11 Col-0 annotated genome. (C) Multidimensional scaling (MDS) plot shows distribution  
856 of the 2 biological replicates of air control, submergence, and recovery samples. Sample distances  
857 were calculated based on the top 2000 pairwise contrasting genes. (D) Gene view of coverage of  
858 ribosome footprints on 4 genes: nuclear-encoded plastid *RIBOSOMAL PROTEIN S9* (*RPS9*;  
859 At1g74970), *RESPIRATORY BURST OXIDASE HOMOLOG* (*RBOHD*; At5g46910), *SENESCENCE-*  
860 *ASSOCIATED GENE113* (*SAG113*; At5g59220) and *ORESARA1* (*ORE1/NAC6*, At5g39610). The  
861 same y-axis scale was used for each gene across samples, with the scale maximum shown. Gene  
862 structures are depicted with the direction of transcription shown. (E) Number of differentially expressed  
863 genes (DEGs) ( $P_{\text{adj}} < 0.05$ ) showing absolute differences independent of treatment responses, a  
864 comparison of Bay-0 and Lp2-6 read counts during the same treatment conditions. (F) Number of  
865 DEGs ( $P_{\text{adj}} < 0.05$ ) showing accession  $\times$  treatment interaction effects for each comparison.

866

867 **Fig. S3.** Common molecular processes in Bay-0 and Lp2-6 after submergence and 3 h of recovery.  
868 Fuzzy K-means plots visualize the regulation patterns of common response DEGs ( $P_{\text{adj}} < 0.05$ ) under  
869 control, submergence, and recovery. DEGs were individually plotted using RPKM values corrected for  
870 library size and library composition. GO analyses of identified clusters revealed associated biological  
871 processes, where higher yellow color intensity indicates a stronger correlation between the genes  
872 cluster and the GO term.

873

874 **Fig. S4.** Controlled ROS production is required for recovery signaling. (A) Electron paramagnetic  
875 resonance (EPR) spectroscopy quantified ROS in Bay-0 and Lp2-6 intermediate leaves of control or  
876 recovering plants after 5 d of darkness (n=30). There was no significant difference (p<0.05) between  
877 the accessions at the specified time point. (B) Relative mRNA abundance of *RBOHD* measured by  
878 qRT-PCR in Bay-0 and Lp2-6 intermediate leaves following de-submergence after 5 d of submergence  
879 (n=3). Data represent mean  $\pm$  SEM. Different letters represent significant difference (p<0.05, two-way  
880 ANOVA with Tukey's multiple comparisons test). (C) Representative images of *rbohD* mutants and  
881 Col-0 wild-type plants recovering after 6 d of dark submergence. Representative images of recovering  
882 Bay-0 (D) and Lp2-6 (E) plants sprayed with 200  $\mu$ M of the NADPH oxidase inhibitor DPI immediately  
883 upon de-submergence, following 5 d of submergence.

884

833 **Fig. S5.** ABA regulation of *SAG113* and *ORE1*. Relative mRNA abundance of *SAG113* (A), *ORE1*  
834 (B), *RD29B* (C), and *RD22* (D) measured by qRT-PCR in intermediate leaves of Bay-0 before  
835 treatment (pre-sub), after 5 d of submergence (0 h) and subsequent recovery and treated with or  
836 without AA1 (n=3-4 biological replicates). (E) Stomatal aperture (based on width/length ratio) for Bay-0  
837 intermediate leaves with or without 100  $\mu$ M AA1 application upon de-submergence (n=300). (F) Seed  
838 germination rates of Col-0 on 1/2 MS medium with varying ABA and AA1 concentrations (n=5). Data  
839 represent mean  $\pm$  SEM. Different letters represent significant difference (p<0.05, one- or two-way  
840 ANOVA with Tukey's multiple comparisons test).

841

#### 842 **Supplemental Movie**

843 Time-lapse of a representative Bay-0 and Lp2-6 rosette recovering in normal growth conditions after 5  
844 d of dark submergence.

845

#### 846 **Supplemental Dataset**

847 Log<sub>2</sub>FC, Benjamini-Hochberg-corrected P-values, and fuzzy K-means cluster number for all genes in  
848 the Ribo-seq dataset. Data is organized by 3 comparisons: submergence (plants submerged for 5 d in  
849 the dark compared to control plants), recovery (plants recovered for 3 h after de-submergence  
850 following 5 d of submergence compared to plants immediately de-submerged after 5 d of  
851 submergence), and combined response (plants recovered for 3 h compared to control plants).

852

853

854

855

856

857

858

859

860

861

862

Fig. S1

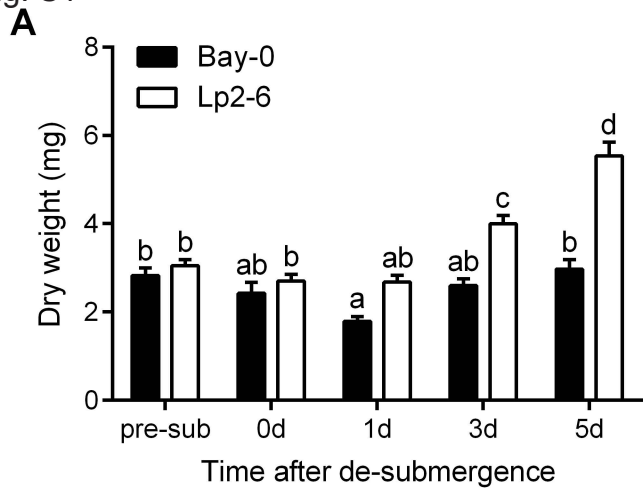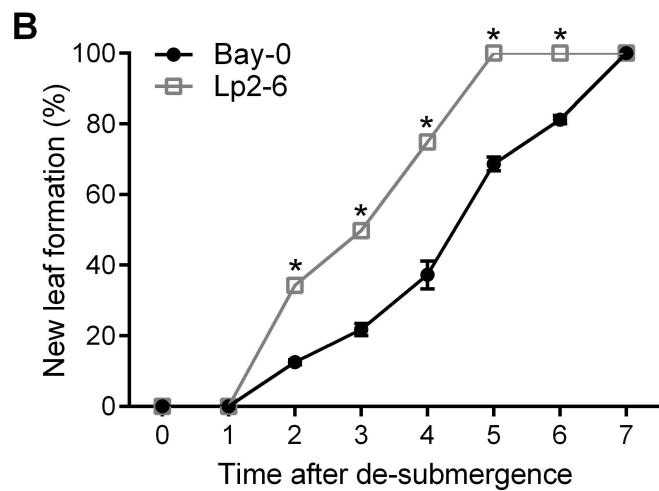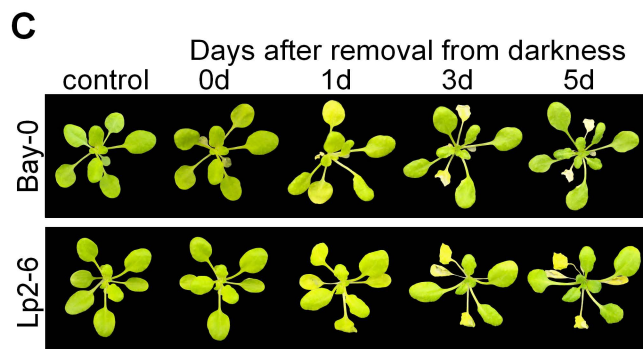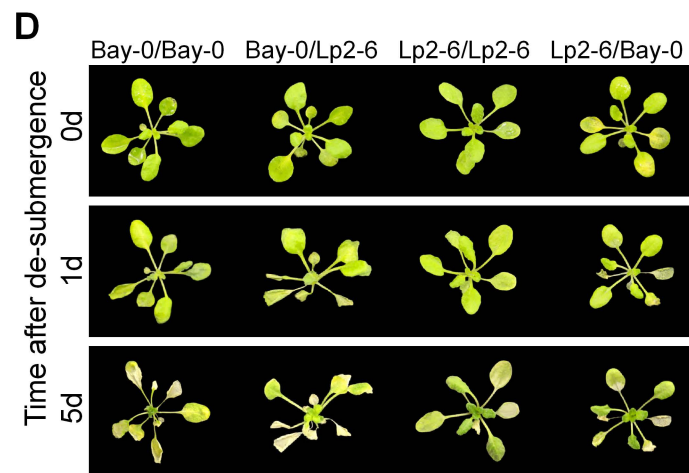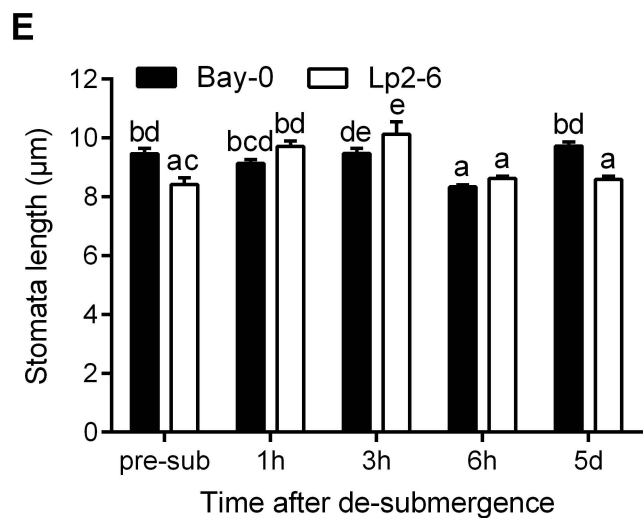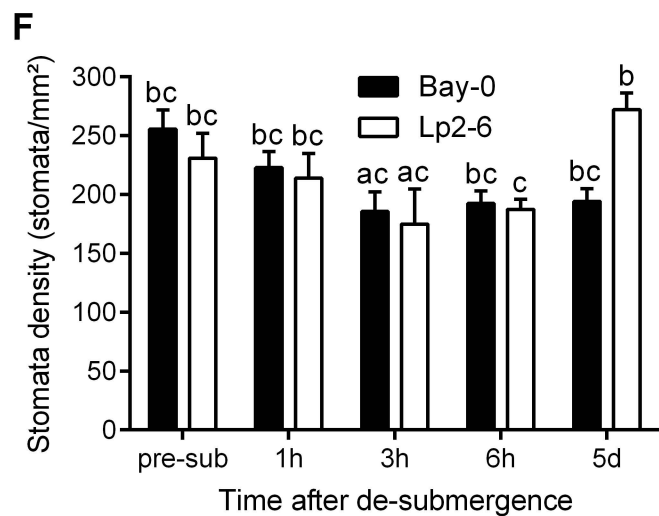

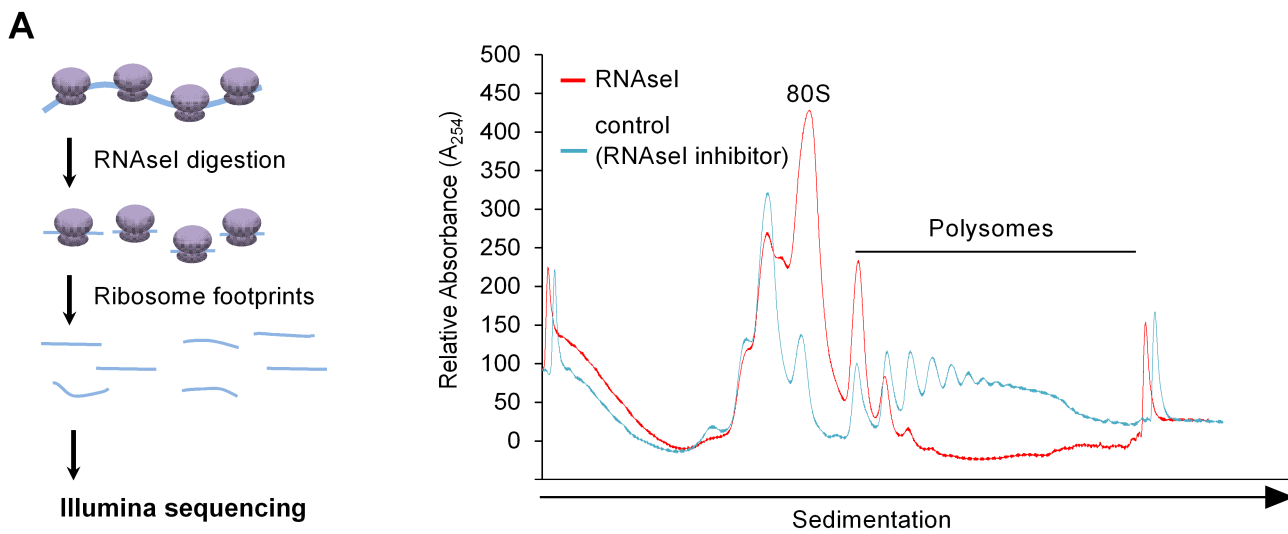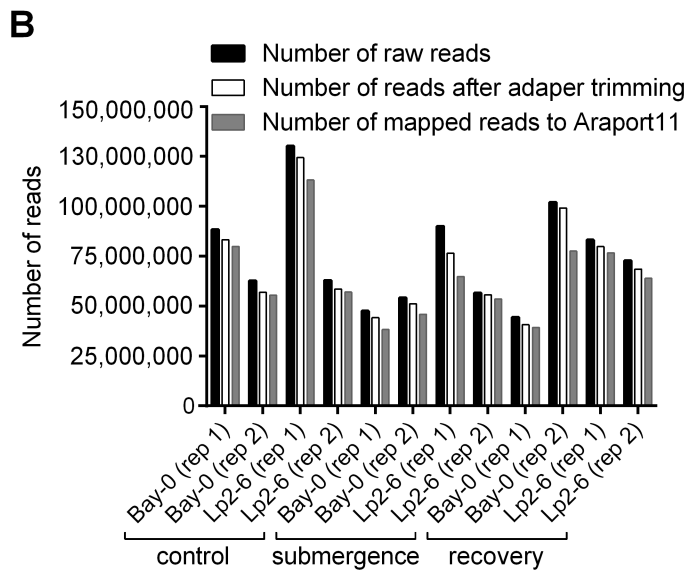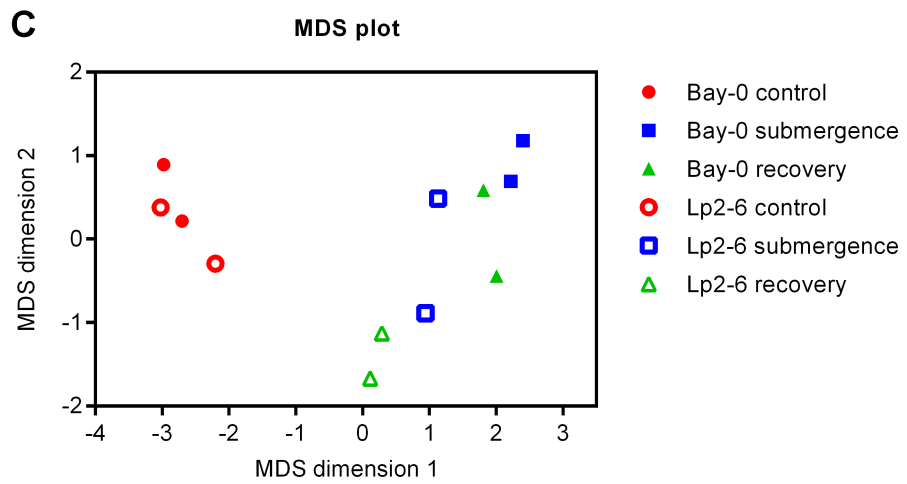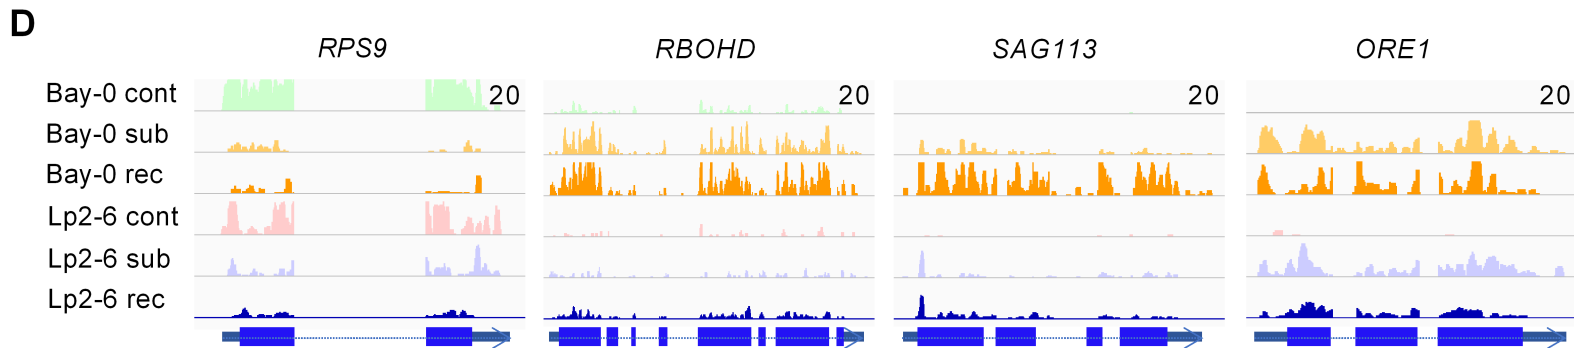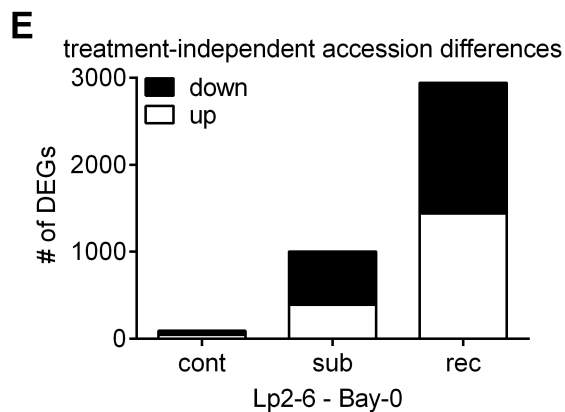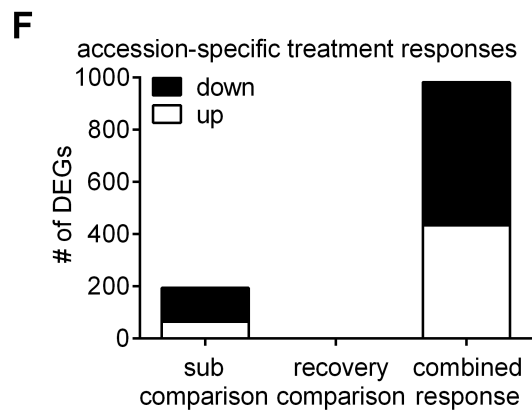

Fig. S3

## Common response

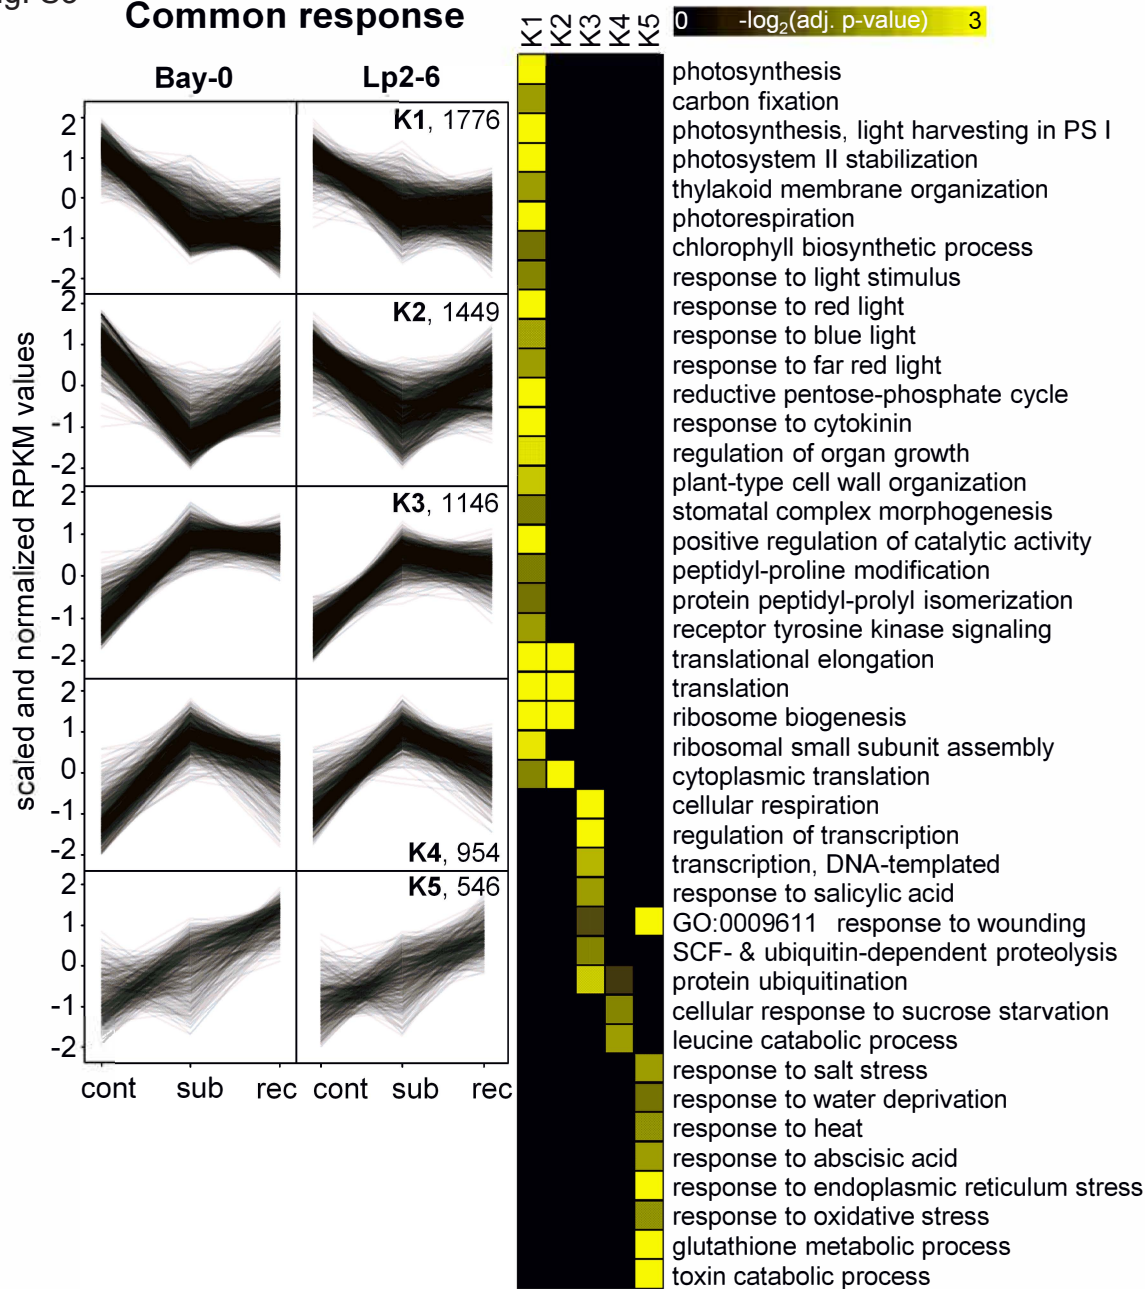

Fig. S4

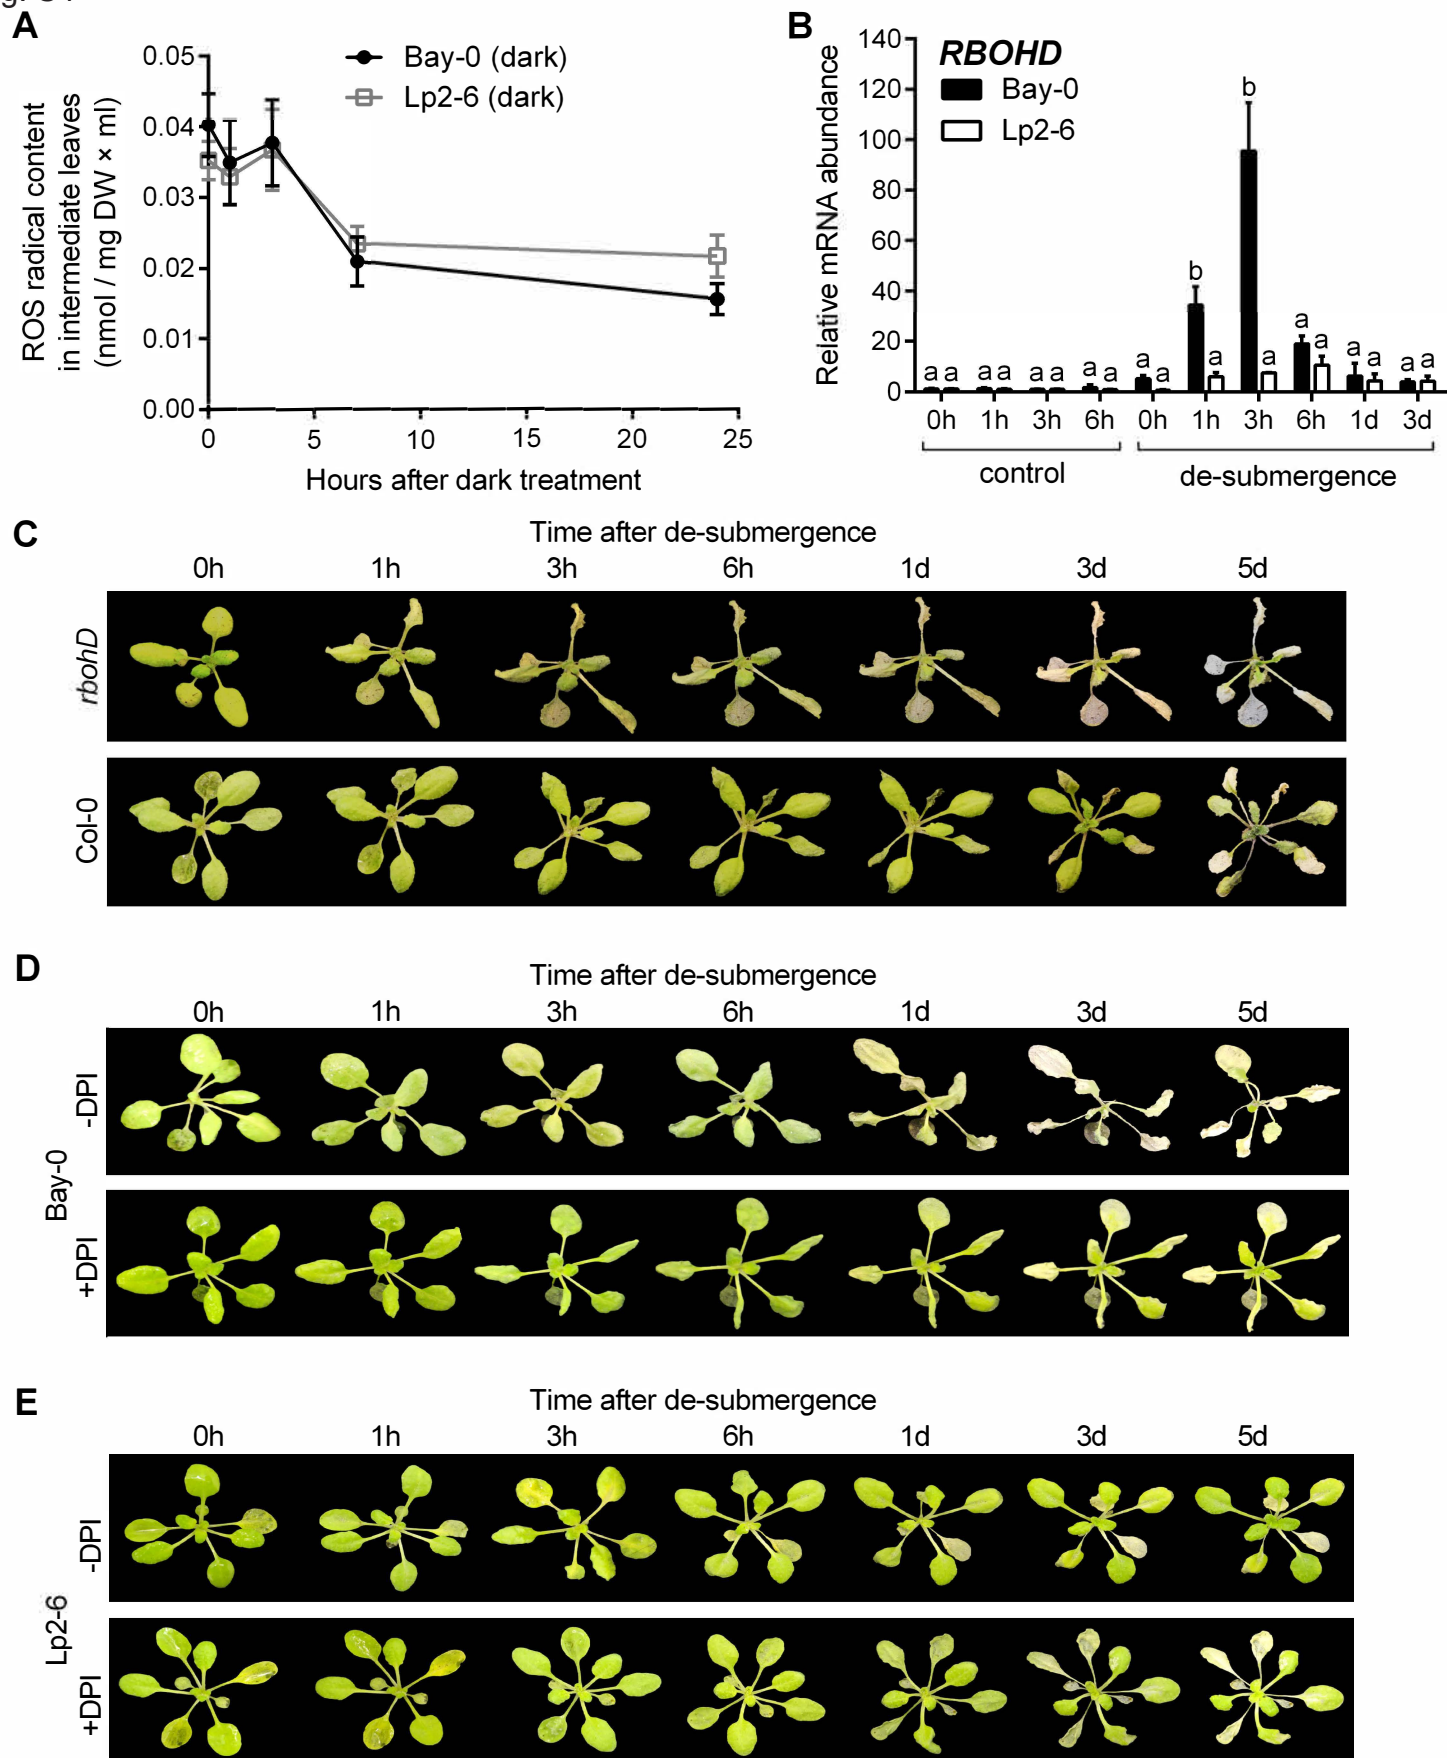

**A**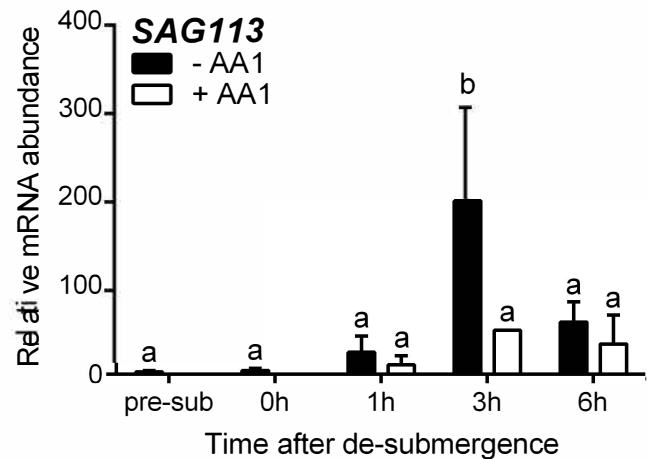**B**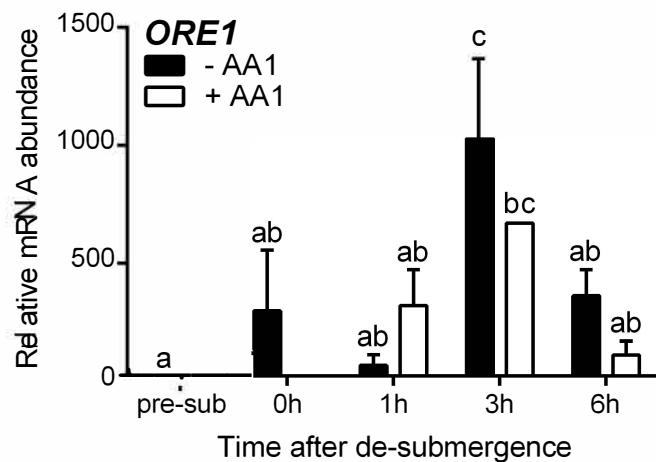**C**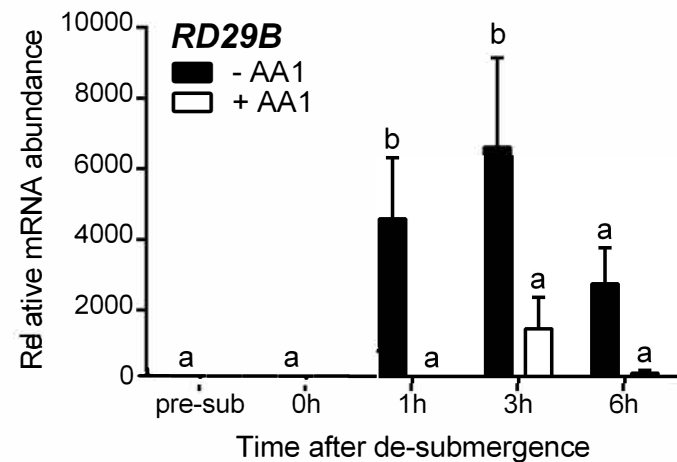**D**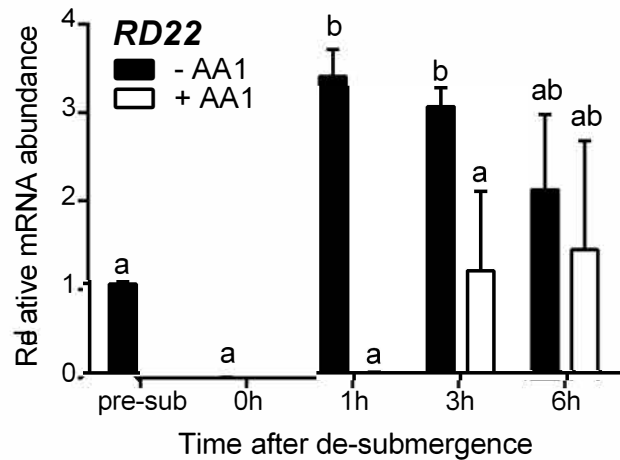**E**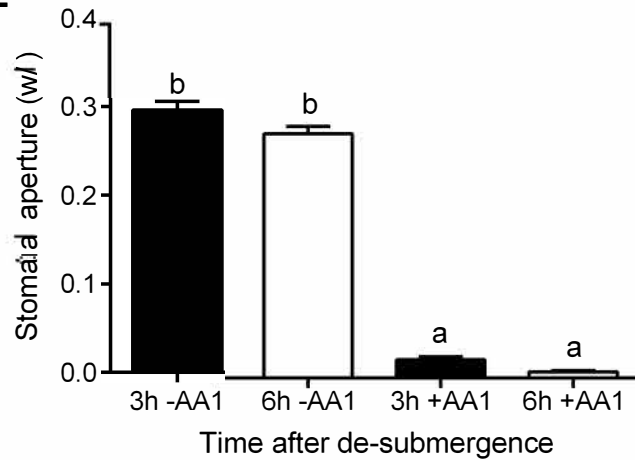**F**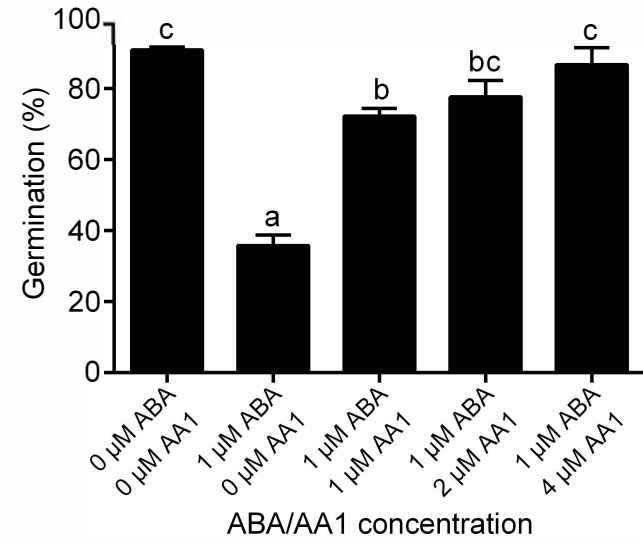



**Table. S1.** Primer sequences (5' → 3') for genotyping, indicated by the left primer (LP) and right primer (RP) of the insertion.

| <b>Mutant</b>  | <b>ATG number</b> | <b>SALK/NASC Line</b> | <b>Sequence (5' → 3')</b> |
|----------------|-------------------|-----------------------|---------------------------|
| <i>sag113</i>  | At5g59220         | SALK_142672C          | LP: TAATCGTCGTCCAGGTGTTG  |
|                |                   |                       | RP: TTTGACGATCACATGGCTGA  |
| <i>ore1</i>    | At5g39610         | SALK_090154           | LP: GATCTTAGGGTTACGTTGGGA |
|                |                   |                       | RP: GGAAAGCCACAGGAAAAGAC  |
| <i>rbohD-3</i> | At5g47910         | N9555                 | LP: CGCCGAGACTCTCAAATTCA  |
|                |                   |                       | RP: ATACTGATCATAGGCGTGGC  |

**Table. S2.** Primer sequences (5' → 3') for qRT-PCR.

| <b>Gene</b>   | <b>ATG number</b> | <b>Sequence (5' → 3')</b>                  |
|---------------|-------------------|--------------------------------------------|
| <i>SAG113</i> | At5g59220         | forward: TCGACGGTGA <del>CTT</del> ACAGAGG |
|               |                   | reverse: GAGACTCGCATAGGACGACA              |
| <i>ORE1</i>   | At5g39610         | forward: TCTGCTACTGCCATTGGTGAAGT           |
|               |                   | reverse: TCGGGTATTTCCGGTCTCTCAC            |
| <i>RBOHD</i>  | At5g47910         | forward: CCGGAGACGATTACCTGAGC              |
|               |                   | reverse: CGTCGATAAGGACCTTCGGG              |
| <i>RD29B</i>  | At5g52300         | forward: GAACGTCGTTGCCTCAAAGC              |
|               |                   | reverse: TGCCCGTAAGCAGTAACAGATC            |
| <i>RD22</i>   | At5g25610         | forward: CGGCTGATTTAACACCGGAG              |
|               |                   | reverse: ACCTCCCTTTCCAACGTTCA              |
| <i>ACTIN2</i> | At3g18780         | forward: TTCGTGGTGGTGAGTTTGTT              |
|               |                   | reverse: GCATCATCACAAAGCATCCTAA            |
